# In-depth sequence-function characterization reveals multiple paths to enhance phenylalanine ammonia-lyase (PAL) activity.

Vikas D. Trivedi<sup>1\*</sup>, Todd C. Chappell<sup>1\*</sup>, Naveen B. Krishna<sup>2</sup>, Anuj Shetty<sup>2</sup>, Gladstone G. Sigamani<sup>2</sup>, Karishma Mohan<sup>1</sup>, Athreya Ramesh<sup>1</sup>, Pravin Kumar R.<sup>2</sup>, Nikhil U. Nair<sup>1</sup>✉

<sup>1</sup> Department of Chemical and Biological, Tufts University, Medford, USA 02155

<sup>2</sup> Kcat Enzymatic Private Limited, Bengaluru, Karnataka, India

\* Equal contribution

✉Corresponding author, [nikhil.nair@tufts.edu](mailto:nikhil.nair@tufts.edu), @nair\_lab

**Keywords:** PAL, phenylalanine ammonia-lyase, phenylketonuria, PKU, deep mutational scanning, DMS, directed evolution, enzyme, QM/MM, molecular dynamics, MD

## ABSTRACT.

Phenylalanine ammonia-lyases (PALs) deaminate L-phenylalanine to *trans*-cinnamic acid and ammonium and have widespread application in chemo-enzymatic synthesis, agriculture, and medicine. In particular, the PAL from *Anabaena variabilis* (*Trichormus variabilis*) has garnered significant attention as the active ingredient in Pegvaliase®, the only FDA-approved drug treating classical phenylketonuria (PKU). Although an extensive body of literature exists on structure, substrate-specificity, and catalytic mechanism, protein-wide sequence determinants of function remain unknown, which limits the ability to rationally engineer these enzymes. Previously, we developed a high-throughput screen (HTS) for PAL, and here, we leverage it to create a detailed sequence-function landscape of PAL by performing deep mutational scanning (DMS). Our method revealed 79 hotspots that affected a positive change in enzyme fitness, many of which have not been reported previously. Using fitness values and structure-function analysis, we picked a subset of residues for comprehensive single- and multi-site saturation mutagenesis to improve the catalytic activity of PAL and identified combinations of mutations that led to improvement in reaction kinetics in cell-free and cellular contexts. To understand the mechanistic role of the most beneficial mutations, we performed QM/MM and MD and observed that different mutants confer improved catalytic activity via different mechanisms, including stabilizing first transition and intermediate states and improving substrate diffusion into the active site, and decreased product inhibition. Thus, this work provides a comprehensive sequence-function relationship for PAL, identifies positions that improve PAL activity when mutated and assesses their mechanisms of action.

37 **INTRODUCTION.**

38 Phenylalanine ammonia-lyases (EC 4.3.1.24; PALs) non-oxidatively deaminate L-  
39 phenylalanine (Phe) to *trans*-cinnamic acid (tCA), releasing ammonium (NH<sub>4</sub><sup>+</sup>), and are widely  
40 found associated with secondary metabolism in plants, bacteria, and fungi<sup>1</sup>. They are part of  
41 a family of enzymes that contain the rare, autocatalytically forming 4-methylideneimidazole-5-  
42 one (MIO) adduct, which enables deamination without an exogenous cofactor such as  
43 pyridoxal 5-phosphate (PLP) and/or co-substrate(s)<sup>2</sup>. Biocatalytic applications for natural  
44 product and fine chemical synthesis, as well as therapeutic potential have driven the  
45 discovery, expression, characterization, and engineering of PALs<sup>3-8</sup>. In particular, the recent  
46 success translating PAL into an enzyme replacement therapy for phenylketonuria (PKU)  
47 management and potential use as a cancer therapy have further increased interest in  
48 engineering this class of enzymes<sup>9-12</sup>. While there is extensive literature on the structure and  
49 catalytic mechanism of PALs, and a general understanding of how residues in the substrate-  
50 binding pocket contribute to specificity and turnover, led by semi-rational and homology-  
51 guided mutagenesis studies<sup>13-15</sup>, there is poor understanding of how more distal residues  
52 affect function.

53  
54 Generally, directed evolution can identify mutational hotspots using large mutant libraries,  
55 independent of their proximity to the active site. But there have only been two such studies  
56 with PALs – one study resulted in modest improvement in activity<sup>16</sup> whereas the other,  
57 conducted by us, identified only residues within the active site<sup>17</sup>. Because both studies  
58 involved characterization of a limited subset of mutants following directed evolution,  
59 conclusions could only be drawn regarding very specific mutations at a few positions. Deep  
60 mutational scanning (DMS), an emerging approach to assess sequence-function  
61 relationships<sup>18</sup>, can help identify functional hotspots<sup>19</sup>, and when coupled with directed  
62 evolution, can accelerate and broaden engineering campaigns<sup>20,21</sup>. Specifically, DMS can  
63 provide a comprehensive map of sequence–function relationships to explore the protein  
64 fitness landscapes<sup>19</sup>, discover new functionally relevant sites<sup>22</sup>, improve molecular energy  
65 functions, and identify beneficial combinations of mutations for protein engineering<sup>23</sup>. With the  
66 increasing successful application of DMS,<sup>6,24-37</sup> we felt a systematic study exploring complete  
67 sequence-function relationships would be useful to better understand and engineer PALs with  
68 enhanced activity.

69  
70 Previously, we developed a growth-coupled enrichment for rapid screening of high-activity  
71 variants of AvPAL\* (the double mutant C503S-C565S PAL from *Anabaena variabilis*, currently  
72 used to formulate the PKU drug Pegvaliase®) in *E. coli*<sup>17</sup>. After a single round of directed  
73 evolution using this growth-coupled enrichment, we identified active site mutations G218S and

74 M222L that possessed ~1.8-fold improvement in turnover frequency ( $k_{\text{cat}}$ ). Here, we vastly  
75 expand upon our prior work. First, we provide a detailed sequence-function landscape of  
76 AvPAL\*, using DMS to identify 79 hotspot residues that improve activity. Next, we picked  
77 seven hotspots for comprehensive single- or multi-site saturation mutagenesis to study their  
78 interactions and further enhance the catalytic activity. We noted that the beneficial mutations  
79 were not well-represented in the natural sequence diversity of homologous PAL enzymes. We  
80 observed that few mutations showed positive fitness with increasing number of co-mutating  
81 residues. We also found that the best combination of mutation among 7 sites were a double  
82 (T102E-M222L) and triple (T012E-M222L-D306G) mutant that displayed a ~2.5-fold  
83 improvement in the  $k_{\text{cat}}$  (and >3-fold increase in catalytic efficiency). To understand the  
84 mechanistic role of key mutations in hyperactive variants, we performed modelling studies  
85 (Quantum Mechanical, QM/MM, and Molecular Dynamics, MD, including metadynamics) and  
86 concluded that there are multiple pathways to enhance PAL catalytic activity, including, i)  
87 decreased root mean square fluctuation (RMSF) of substrate in the active site, ii) greater  
88 proximity of the substrate to catalytic residues, iii) stabilization of the substrate in the near  
89 attack conformation, iv) stabilization of the transition and intermediate states, and v) facilitated  
90 diffusion of the substrate to the active site. Based on the unique experimental and  
91 computational insights, we also created a variant T102E-M222L-N453S that displayed lower  
92 product inhibition and ~6-fold higher activity in a whole-cell context. In summary, this study  
93 significantly advances basic and applied enzymology of PALs, a heretofore understudied class  
94 of enzymes with a wide array of applications.

95

## 96 **RESULTS & DISCUSSION.**

### 97 **Overview.**

98 The overall workflow of this work is summarized in **Fig. 1**. Starting with a randomly  
99 mutagenized library, we first performed deep mutational scanning (DMS) of AvPAL\* using a  
100 growth-based high-throughput screen (HTS) to evaluate the fitness – or change in relative  
101 frequency over the three passages – of each mutation. Briefly, we deep sequenced plasmid  
102 libraries from the naïve and each of the three enrichment passages to identify mutations that  
103 occurred at each position, calculated the change in occurrence frequency for every mutation  
104 in each of the enriched populations relative to the naïve library (fitness), and mapped them  
105 onto the protein sequence and structure. Using fitness, structural insights, and domain  
106 knowledge, we classified certain positions as mutational hotspots from which we generated  
107 site-saturation mutagenesis libraries of each position alone, or in combination. We then  
108 enriched these libraries using our HTS, as before, and identified additional variants that with  
109 further enhanced activity. Next, we performed MD, including metadynamics, and QM/MM  
110 studies to characterize the catalytic mechanism of AvPAL\*, and assess the functional impact

111 that these mutations have on its catalytic activity. Finally, we used data from all investigations  
112 to devise hyperactive AvPAL\* variants.  
113

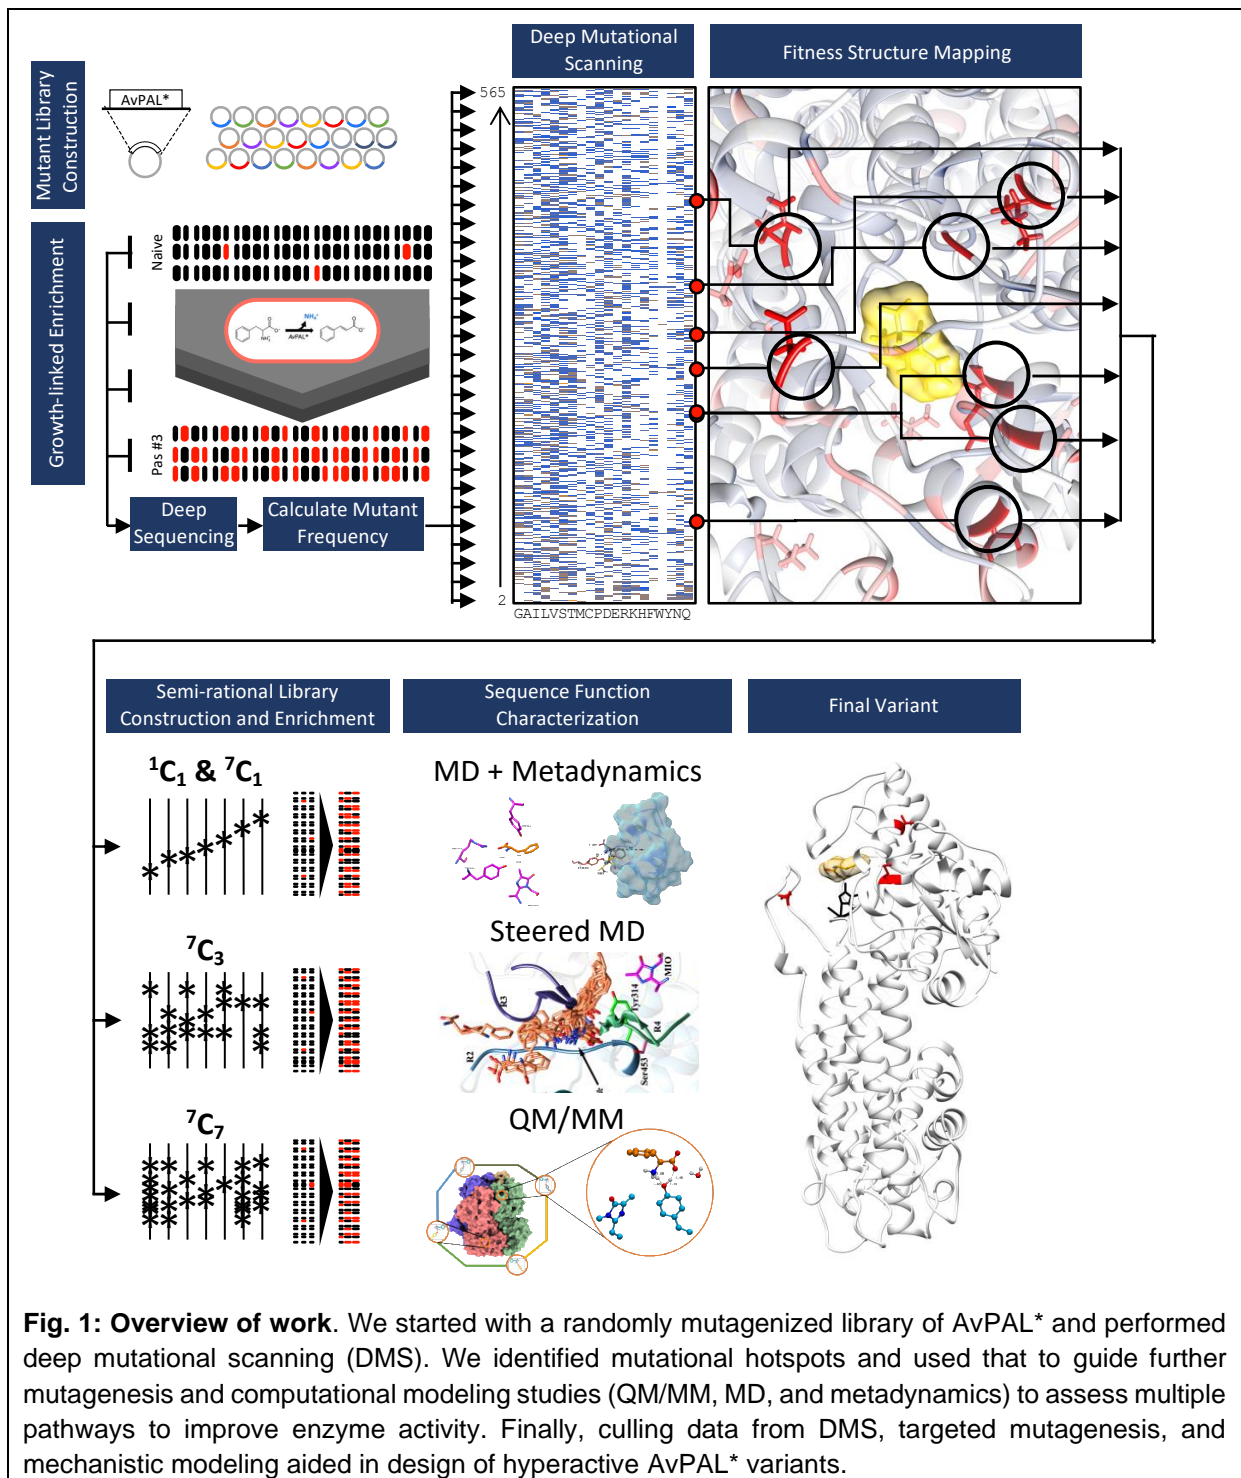

114  
115 **Fig. 1: Overview of work.** We started with a randomly mutagenized library of AvPAL\* and performed  
116 deep mutational scanning (DMS). We identified mutational hotspots and used that to guide further  
117 mutagenesis and computational modeling studies (QM/MM, MD, and metadynamics) to assess multiple  
118 pathways to improve enzyme activity. Finally, culling data from DMS, targeted mutagenesis, and  
119 mechanistic modeling aided in design of hyperactive AvPAL\* variants.  
120

121 **Deep mutational scanning (DMS) of AvPAL\* and analysis of active site residues.**

122 The naïve library contained approximately 2-4 amino acid mutations per gene, and had a  
 123 broad distribution of mutations, with no major bias prior to enrichment (**Fig. 2a**). Since the  
 124 naïve library was generated using error-prone PCR, it had an average of 5.6 substitutions per  
 125 residue (not 20), with a range of 2–7 (**Fig. 2b**). Comparatively, the enriched library from the  
 126 third passage averaged only 0.6 mutations per position, with a range of 0–5 mutations. The  
 127 enriched library also contained only 222 positions with at least one mutation (relative to the  
 128 overall protein size of 565 amino acids). We found that all premature nonsense codons in the  
 129 naïve library were rapidly depleted, and the library also shifted from majority non-synonymous  
 130 to synonymous mutations during enrichment (**Fig. S1**).

131

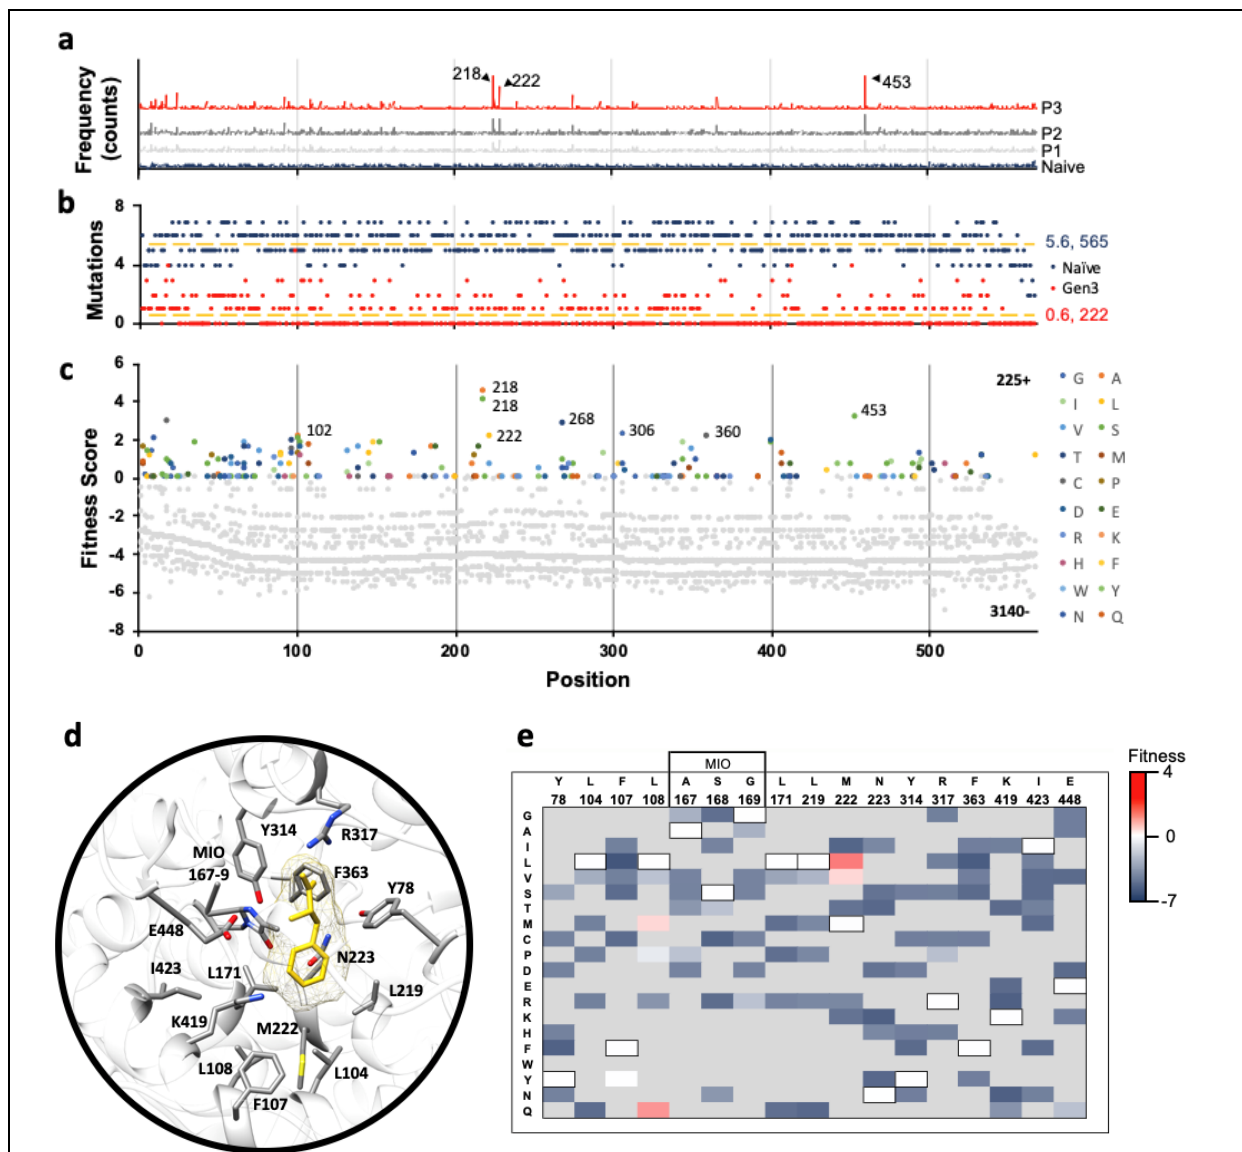

132

133

134 **Fig. 2: AvPAL\* deep mutational scanning (DMS) outcomes.** **a)** Mutation frequency in naïve and  
 135 passages #1-3. Positions (a.a.) corresponding to the three most highly enriched positions are labeled  
 136 (218, 222, and 453). **b)** Number of mutations sampled at each position in the naïve (dark blue) and

137 passage #3 (red) libraries. The naïve library had an average of 5.6 mutations per position across all  
138 565 positions. Passage #3 library had an average of 0.6 mutations per position across 222 positions.  
139 **c)** Fitness of all mutations present at all positions in the passage #3 library. Negative fitness denotes  
140 mutations that decrease in frequency over passages; the highest fitness mutations are labeled (G218A,  
141 G218S, M222L, I268T, D306G, G360C, and N453S). Position labels (x-axis) are the same for panels  
142 (a-c). **d)** Active site residues of AvPAL\* (grey sticks) with phenylalanine ligand (yellow) docked. **e)**  
143 Fitness heatmap of active site residues at passage #3. Wildtype residues of AvPAL\* are bordered in  
144 black and listed above the residue position. Grey boxes indicate mutations not sampled in library.

145

146 To evaluate the relative increase of each mutant variant in library during enrichment, we  
147 calculated a fitness score for each mutation. We found that the maximum fitness scores and  
148 growth rate across passages generally increased, as expected, indicative of strong positive  
149 selection for PAL activity (**Fig. S1–3**). We also found a good correlation between enzyme  
150 specific activity and fitness conferred (**Fig. S4**). Overall, 93% of mutations in the library had  
151 negative fitness in the third passage, indicating that most mutations are deleterious (**Fig. 2c**).  
152 Our data revealed that the active site residues – catalytic and substrate binding – were  
153 generally non-permissive to mutations (**Fig. 2d, e**). Only two positions had mutations with  
154 positive fitness (L108 and M222). Although we did not sample all 20 amino acids at each  
155 position, our data is in good agreement with published literature. Y78, Y314, and the MIO-  
156 forming triad (A167, S168, and G169) that are implicated to play essential roles in catalysis<sup>38</sup>  
157 and highly conserved in PALs were found to be non-permissive to mutations. L104, F107,  
158 L108, and L171 in AvPAL\* are part of the substrate binding pocket that interacts with the  
159 hydrophobic moiety of Phe. Among these, L104, L171, and L219 are three of the most highly  
160 conserved residues in tyrosine/phenylalanine ammonia lyases (TPALs) and mutases<sup>2</sup> and any  
161 substitution had negative impact on fitness (**Fig. 2e**). F107 equivalent position shows more  
162 diversity, as PALs contains Phe<sup>36</sup>, TPALs contain basic amino acids Arg<sup>37</sup> or His<sup>30</sup>, whereas  
163 ammonia mutase carry more polar amino acids Cys<sup>28,39</sup> or Ser<sup>40</sup>. In PALs, F107 forms edge-  
164 edge interaction with the phenyl ring of the substrate<sup>8</sup> and hence a mutation to Tyr is likely to  
165 be minimally disruptive, consistent with neutral fitness of F107Y in our data. In an earlier study,  
166 L108A, G mutations were shown to drastically reduce the enzyme activity suggesting it is not  
167 permissive to mutations<sup>8</sup>. However, we found L108Q, M to have positive fitness, suggesting  
168 the need for a large uncharged sidechain to fill-in the active site and maintain favorable  
169 interaction with the substrate. We confirmed L108Q and M to be more active and L108G to be  
170 less active than parental AvPAL\* on phenylalanine (**Fig. S5**). Though L108M agrees with the  
171 requirement of hydrophobic residue to maintain nonpolar contacts<sup>8</sup>, L108Q is an unusual  
172 amino acid change to polar residue at otherwise conserved position. Generally, Leu at 108  
173 equivalent position is conserved in ammonia-lyases active on phenylalanine, and His is found  
174 to be present in enzymes active on Tyr<sup>2</sup>. On performing sequence analysis on AvPAL\*  
175 homologs against the RefSeq protein database, we observed out of the 998 sequences, Leu

176 and His are present at the 108-equivalent position in 490 sequences each, accounting for  
177 98.2% of the sequences, and Ala, Lys, Met, Gln, Thr are found in remaining 18 sequences  
178 (**Table S1**). The M222 position shows greater permissivity in the library and its natural diversity  
179 in homologs. Of the same 998 homologs, 469 had Val, 396 had Met, whereas, Ile, Asn, Thr,  
180 and Leu were found in 105, 15, 7 and 6 sequences, respectively. We found M222L, V to have  
181 higher fitness and thus, higher activity compared to parental AvPAL\*. This is consistent with a  
182 recently concluded study on PcPAL, where bulkiness of the residues lining the active site were  
183 considered important<sup>15</sup>. F363, K419, and E448 all showed negative fitness for all substituted  
184 amino acids sampled and are conserved in PALs and TALs with available structures. I423  
185 showed negative fitness for all mutations, including Thr, the equivalent of which in  
186 *Petroselinum crispum* PAL (PcPAL) (I460T) demonstrated a modest 1.15-fold increase in  
187  $k_{cat}$ <sup>41</sup>. Thus, many of the outcomes of the analysis of DMS data related to active site residues  
188 are largely consistent with published data on PALs, supporting the validity of the workflow and  
189 calculated fitness scores as proxy for enzyme activity (**Fig. S4**). Further, we identified 4 distinct  
190 active site mutations at L108 and M222 that increase AvPAL\* activity, only one of which has  
191 been previously reported (M222L, by our group)<sup>17</sup>.

192

### 193 **Sequence-function characterization highlights hotspots that enhance activity.**

194 To identify “hotspots” that contribute highly to activity across the three passages, we calculated  
195 the fitness of each mutation for each passage and then used linear regression to determine  
196 the rate of change of fitness over these passages – i.e., their fitness gradient (**Fig. 3a**). We  
197 omitted the N-terminal residues since they were previously shown to be dispensable for  
198 AvPAL\* activity<sup>8</sup>, as well as any mutation with a frequency of zero in any passages or less  
199 than 0.625 % in passage #3, to better identify the most significant mutations. From the 225  
200 positively fit mutations found in the passage #3, we identified 12 positions (and 14 mutations)  
201 with positive fitness gradients and mapped the fitness onto the structure of AvPAL\* (PDB ID:  
202 3CZO) to investigate where the most fit positions are located relative to the active site and one  
203 another (**Fig. 3b-e**). Interestingly, we found that the most fit mutations were clustered at either  
204 end of the protein chain, with many distal from the active site. We docked phenylalanine (Phe)  
205 into the crystal structure of the AvPAL\* (2NYN) and calculated the distance of the  $\alpha$ -carbon of  
206 each residue to the  $\alpha$ -carbon of Phe docked in the active site of the same chain (**Fig. 3c**). We  
207 saw that 7 of 12 of the fittest mutations were  $>50$  Å from the docked Phe. Noting that AvPAL\*  
208 is a homotetramer composed of dimers with chains oriented anti-parallel, we found that  
209 intramolecular distal residues were proximal to adjacent active sites (**Fig. 3d**). We see that  
210 positions 268, 294, 306, 400, and 494 from the B-chain are actually closest to the A-chain  
211 substrate Phe, as are the 407, 533 and 534 positions from the C-chain. In fact, previous  
212 investigations into the structure of AvPAL\* have identified loops in the adjacent chains that

213 play an important role in forming the active site pocket (**Fig. 3c, e**)<sup>8</sup>. Since G218S and A,  
 214 M222L and N453S had the most abundance in the enriched library, we also investigated if  
 215 these mutations occur together in any combinations (**Table S2**). We observed that single site  
 216 mutants were the most abundant in the library whereas triple mutants were completely absent.  
 217

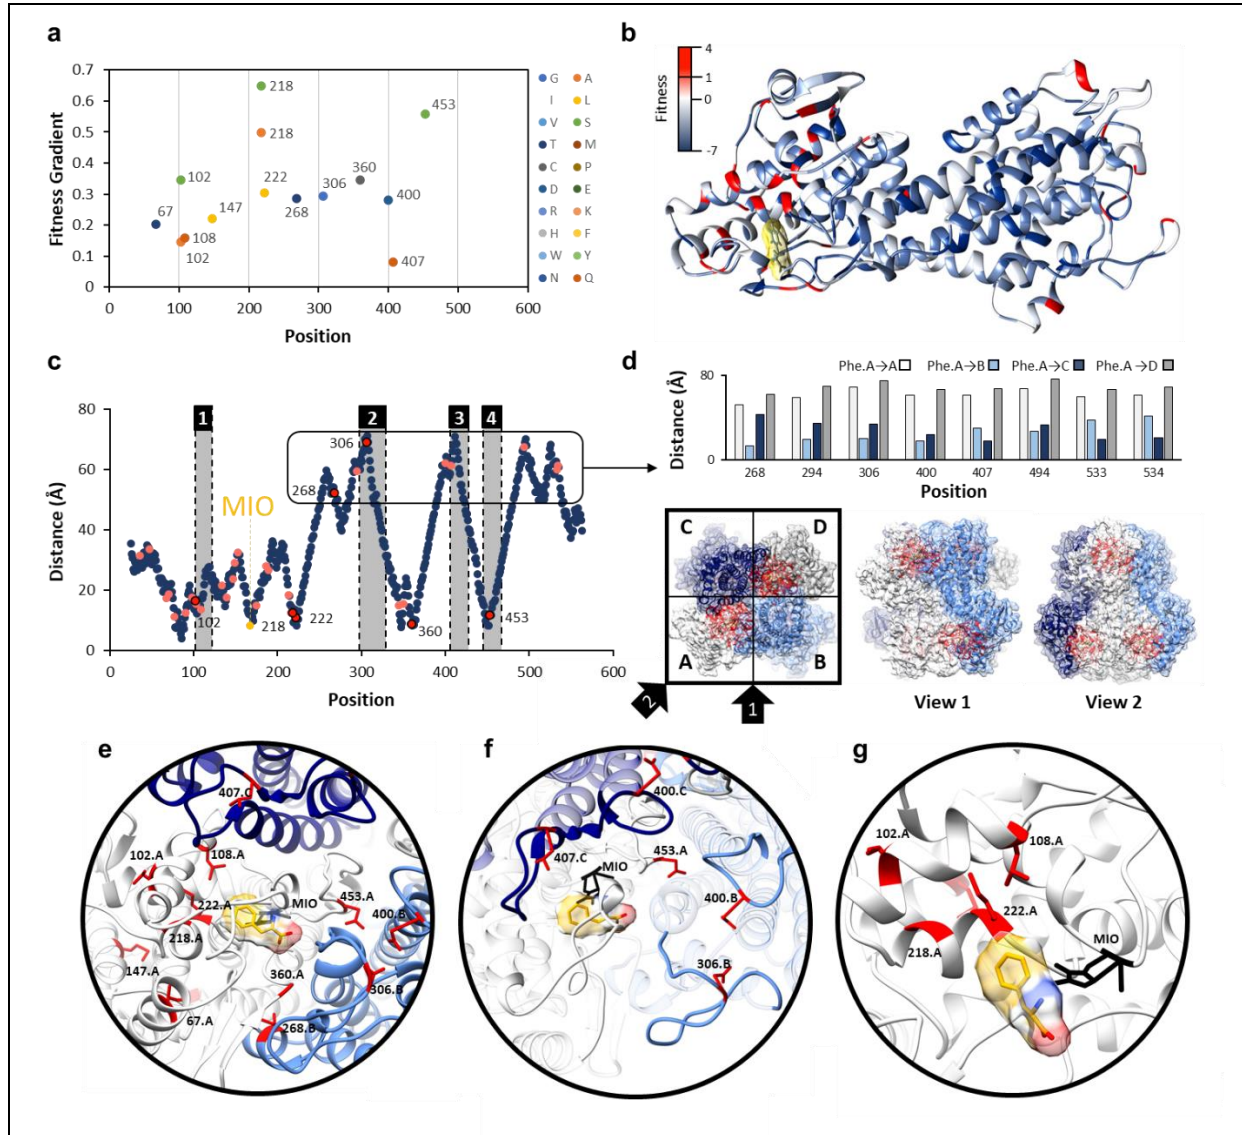

218  
 219 **Fig. 3: Identification and location of highest fitness positions.** **a)** Gradient of fitness is calculated  
 220 from passages 1-3. Only mutations with a frequency greater than zero in all passages and a passage  
 221 #3 frequency greater than 0.625 % are shown. A positive gradient indicates increasing fitness across  
 222 passages. **b)** Fitness values mapped to the structure of a single chain of AvPAL\*. **c)** Distance of the  $\alpha$ -  
 223 carbon of docked phenylalanine to the  $\alpha$ -carbon of every residue in AvPAL\* within the same chain.  
 224 Residues with a passage #3 fitness < 1 are dark blue, 1-2 are pink, and > 2 are red outlined in black.  
 225 Active site loops are numbered 1-4 and shaded grey. **d)** High fitness residues that are distal from the  
 226 active site are proximal to active sites of other subunits when visualized as part of a homotetramer.  
 227 Chains A (white), B (light blue), C (dark blue), and D (grey) are shown from top and two side views.  
 228 Residues near the active site are red. **e)** Locations of most fit residues relative to the active site of Chain  
 229 A. Chains A (white), B (light blue), C (dark blue), and D (grey) are shown. The MIO adduct is black and



230 the phenylalanine in yellow with red and blue oxygen and nitrogen atoms, respectively. Fit residues are  
 231 colored red with sidechains shown. **f)** Residues 400, 407, 306, and 453 are in the active site loops  
 232 previously identified as important for active site stability. **g)** Residues 102, 108, 218, and 222, are part  
 233 of  $\alpha$ -helices that form a surface within the active site, near the phenyl ring of the docked phenylalanine.

234

235 We next sought to identify mutations at hotspots residues that increase enzyme activity and  
 236 assess whether global sequence-function characterization can aid in semi-rational design of  
 237 a highly active AvPAL\* variants. The 7 most fit positions selected were 102, 218, 222, 268,  
 238 306, 360, and 453 (**Fig. 3e**). We generally classified these residues as comprising 2 regions:  
 239 and i) residues located within the loops surrounding the active site (268, 306, 360, and 453)  
 240 (**Fig. 3f**), and ii) residues clustered within a bundle of  $\alpha$ -helices that form a surface in the active  
 241 site (102, 218, 222) (**Fig. 3g**). The 102, 218, 222, 360, and 453 positions most likely act on  
 242 the intra-chain active site, while the 268 and 306 positions are from an adjacent chain (chain  
 243 B, relative to the active site of chain A, and vice versa).

244

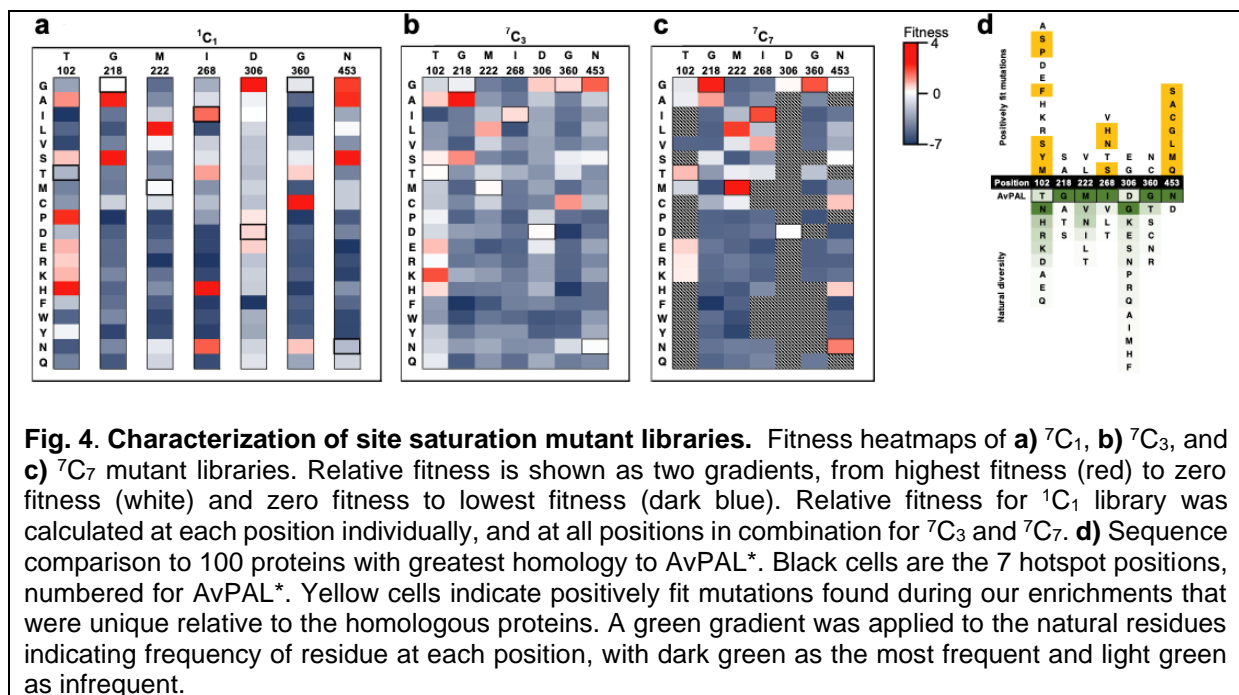

245

246 **Fig. 4. Characterization of site saturation mutant libraries.** Fitness heatmaps of **a)**  ${}^7C_1$ , **b)**  ${}^7C_3$ , and  
 247 **c)**  ${}^7C_7$  mutant libraries. Relative fitness is shown as two gradients, from highest fitness (red) to zero  
 248 fitness (white) and zero fitness to lowest fitness (dark blue). Relative fitness for  ${}^1C_1$  library was  
 249 calculated at each position individually, and at all positions in combination for  ${}^7C_3$  and  ${}^7C_7$ . **d)** Sequence  
 250 comparison to 100 proteins with greatest homology to AvPAL\*. Black cells are the 7 hotspot positions,  
 251 numbered for AvPAL\*. Yellow cells indicate positively fit mutations found during our enrichments that  
 252 were unique relative to the homologous proteins. A green gradient was applied to the natural residues  
 253 indicating frequency of residue at each position, with dark green as the most frequent and light green  
 254 as infrequent.

255

256 To investigate how different mutations interact with each other and shape the fitness, we  
 257 analyzed the 7 hotspots using single ( ${}^7C_1$  – i.e., 7 choose 1), triple ( ${}^7C_3$  – 7 choose 3), and  
 258 hepta-site ( ${}^7C_7$  – 7 choose 7) saturation mutagenesis libraries. We constructed the three  
 259 libraries in a manner allowing us to extensively cover all the combinations practically possible  
 260 (See material and methods). We then enriched these libraries using our HTS and calculated  
 261 the fitness of each residue. **Fig. 4a** shows the fitness of single site saturation mutagenesis of  
 262 all sites when passaged individually ( ${}^7C_1$ ). For all sites, we found substitutions that were fitter  
 263 than the wildtype. For instance, at T102, mutation to Ala, Asp, Pro, or His improves fitness. In

264 fact, this position shows the most permissive behavior with seven amino acid substitutions  
265 showing positive fitness. The other six positions display more restrictive pattern with only 3–4  
266 amino acids showing positive fitness (**Fig. 4a**). In total we found 28 individual substitutions  
267 with higher fitness than the native residue at that position and 24 substitutions with positive  
268 fitness. Interestingly, only 2 of these 24 have previously been described to enhance AvPAL\*  
269 activity (our previous work<sup>17</sup>) – the remaining being new to this work. However, fewer  
270 mutations showed positive fitness scores when evaluated in combination using <sup>7</sup>C<sub>3</sub> and <sup>7</sup>C<sub>7</sub>  
271 libraries (**Fig. 4b, c**). This indicates that while many mutations contribute to positive fitness  
272 individually, most become negatively fit in combination, likely due to negative epistasis and  
273 increased selective pressure due to the presence of more active variants. This agrees with  
274 the observation that double mutants from a G218X-M222X library are less fit than single  
275 mutants at either of those positions (**Fig. S6**). Indeed, the G218A mutations while highly fit in  
276 isolation, is generally unable to contribute significant fitness score when combined with 1 to 6  
277 other mutations (**Fig. 4c, Fig. S6**). We also looked at the naturally occurring diversity at the  
278 seven sites investigated in the present study (**Fig. 4d**). For four of the seven positions (218,  
279 222, 306, 360), we find that the natural diversity fully recapitulated the fittest variants found in  
280 our study. However, for other sites (102, 268, 453), we were able to find novel mutations that  
281 are not predictable through sequence alignment alone. We also noticed that position 306 has  
282 very high natural diversity but is restricted to only two mutations with positive fitness (Glu, Gly).  
283 Conversely, 453 is naturally restricted to only two amino acids naturally (Asn, Glu) but many  
284 alternate mutations increase fitness.

285  
286 To identify the most active variants from the <sup>7</sup>C<sub>3</sub> and <sup>7</sup>C<sub>7</sub> libraries, we picked 20 random  
287 colonies from the enriched culture and tested for growth and tCA production (**Fig. S7–8**). Upon  
288 sequencing variants that showed the highest tCA production, we found mutants with  
289 significantly higher activity than parental enzyme (**Table 1**). Among these, T102E-M222L and  
290 T102R-M222L-D306G displayed 2.4- and 2.25-fold improvement in the  $k_{cat}$ , respectively.  
291 Interestingly, T102R-M222L-D306G showed some substrate inhibition (**Fig. S9**, apparent at >  
292 10 mM Phe), although, it did display the highest activity at lower substrate concentrations (<  
293 300  $\mu$ M), which is most relevant for PKU treatment. Other than having isolated the most active  
294 AvPAL\* variants, these results have two additional and major implications. First, only a small  
295 combination of mutations at these sites synergistically and/or additively enhance AvPAL\*  
296 activity (**Fig 4d**). Second, the propensity of these mutations to act additively and/or  
297 synergistically may be explained by the mechanism by which they contribute to PAL activity.  
298 To understand the mechanism by which the different mutations may contribute increasing  
299 activity, we performed in silico modelling studies.

300

301

302 **Table 1.** Kinetic constants of highest activity AvPAL\* variants.

| PAL-variant             | Model | $V_{max}$                                 |                   |                   | $K_i$ (mM) | $k_{cat}$ ( $s^{-1}$ ) | $k_{cat}/K_M$ ( $s^{-1} \cdot \mu M^{-1}$ ) | Fold increase $k_{cat}$ |
|-------------------------|-------|-------------------------------------------|-------------------|-------------------|------------|------------------------|---------------------------------------------|-------------------------|
|                         |       | $(\mu mole \cdot min^{-1} \cdot mg^{-1})$ | $K_M$ ( $\mu M$ ) | $K_M$ ( $\mu M$ ) |            |                        |                                             |                         |
| AvPAL*                  | MM    | $0.93 \pm 0.01$                           | $137 \pm 0$       | -                 | 0.97       | 0.007                  | 1.00                                        |                         |
| M222L                   | MM    | $1.85 \pm 0.02$                           | $145 \pm 7$       | -                 | 1.93       | 0.013                  | 1.99                                        |                         |
| L4P-G218S               | SI    | $1.86 \pm 0.02$                           | $199 \pm 9$       | $208 \pm 39$      | 1.94       | 0.010                  | 2.00                                        |                         |
| G218S                   | SI    | $1.49 \pm 0.02$                           | $180 \pm 9$       | $164 \pm 26$      | 1.55       | 0.009                  | 1.60                                        |                         |
| G218A                   | SI    | $1.01 \pm 0.02$                           | $43 \pm 4$        | $96 \pm 18$       | 1.05       | 0.024                  | 1.09                                        |                         |
| T102P                   | MM    | $1.88 \pm 0.02$                           | $253 \pm 20$      | -                 | 1.96       | 0.008                  | 2.02                                        |                         |
| T102E-M222L             | MM    | $2.33 \pm 0.02$                           | $144 \pm 6$       | -                 | 2.43       | 0.017                  | 2.51                                        |                         |
| T102S-M222L             | SI    | $1.88 \pm 0.02$                           | $111 \pm 6$       | $371 \pm 136$     | 1.96       | 0.018                  | 2.02                                        |                         |
| T102M-M222L-D306G-N453G | SI    | $1.15 \pm 0.01$                           | $48 \pm 3$        | $147 \pm 24$      | 1.20       | 0.025                  | 1.24                                        |                         |
| T102R-M222L-D306G       | SI    | $2.16 \pm 0.02$                           | $96 \pm 4$        | $169 \pm 21$      | 2.25       | 0.023                  | 2.32                                        |                         |

303

304 MM – Michaelis-Menten (Eqn S1), SI – Substrate inhibition, (Eqn S2)

305

306 **MD studies reveal mutants show local fluctuations in the active site that impacts near**  
 307 **attack conformation.**

308 Having identified mutations that enhance AvPAL\* activity, we were interested in understanding  
 309 the mechanism contributing to increased activity. We conducted extensive all-atom atomistic  
 310 MD studies for different mutants of AvPAL\* to ascertain the stability of attack conformation.  
 311 The starting enzyme substrate (E-S) complex was derived using docking studies; each MD  
 312 simulation was 500 ns  $\times$  2 long; and all post-simulation studies were conducted from 100<sup>th</sup> ns  
 313 onwards. AvPAL\* is a homotetramer, of closely interlocking monomers<sup>6,8,36</sup>. Each tetramer  
 314 contains four catalytic sites, and each active site is comprised of residues from three different  
 315 monomers and one MIO group. Each active site is capped by two flexible loops; an inner loop  
 316 which is packed tightly in the active site and forms interactions with the substrate and an outer  
 317 loop which serves as an external cap. The outer loop is attributed to forming a barrier to bulk  
 318 solvent preventing access to the active site<sup>8</sup>. Reaction mechanism of PALs have been  
 319 extensively studied and involves the formation of N-MIO intermediate (Fig. S10)<sup>25,30</sup>. Here, we  
 320 focused on the formation of the first intermediate state of the substrate in the active site (before  
 321 covalent binding with MIO, Fig. S10a–b). During this step, Y314 functions as the catalytic  
 322 base.

323

324 As the binding conformation of the substrate is not yet identified in any of the PAL crystal  
 325 structure. We performed the docking of Phe in AvPAL\* structure using Autodock4 and then  
 326 chose energetically and structurally feasible conformation for further studies. We observed the  
 327 binding energy to be  $-3.03 \text{ kcal mol}^{-1}$  for the E-S complex. Maintenance of close proximity  
 328 between substrate and catalytic residues over the period of the MD simulation is indicative of  
 329 a stable E-S complex and formation of near-attack conformation. We measured the distances  
 330 between substrate amino nitrogen (Phe(N)) and the MIO methyldene carbon (MIO(C $\beta$ 2)) and  
 331 adjacent chain tyrosine 314 hydroxyl oxygen (Y314(O)) for the variants (Fig. S11).

332 Hyperactive variants, M222L and G218S, but not N453S, show better near-attack  
333 conformation as indicated by closer proximity to MIO when compared to controls, parental  
334 AvPAL\* and low activity variant L108G (**Fig. 5a-d**). We use L108G as a control for our  
335 modeling studies as it has previously been validated as a deleterious mutation<sup>8</sup>. The double  
336 and triple mutants, T012E-M222L and T102R-M222L-D306G, also interact closely with the  
337 reactive MIO(C $\beta$ 2) compared to controls. Next, we calculated root mean square fluctuation  
338 (RMSF) for mutant backbone atoms and normalized them over the parental AvPAL\* to identify  
339 the flexible regions. Higher values are characteristic of flexible regions that readily displace  
340 from their average position in the parental enzyme during simulation and vice-versa for  
341 negative values. Four flexible regions in the high-activity single mutants that show altered  
342 dynamics compared to parental are residues 60–130, 200–230, 280–325, and 440–460 (**Fig.**  
343 **5g, S11**). These regions are located around the active-site and the interface of the dimeric  
344 subunits. The loop residues 285–325 constitutes an access channel of the enzyme and  
345 residues 310–318 forms the second shell of the active site. Regions 60-130 and 440–460  
346 interact with phenyl and carboxylate group of the substrate, respectively. From **Fig. 5g**, we  
347 concluded that the dynamics of AvPAL\* changed with every mutation and the negative control  
348 (L108G) showed very high fluctuation in the access channel and second shell (285–325) that  
349 likely disrupt profitable substrate interactions. In addition, we also evaluated the Free Energy  
350 Surface (FES) obtained from different sets of metadynamics experiment which provide us an  
351 understanding of the energy bins associated within the active site and the regions around it,  
352 which further supports the assertion that beneficial mutants stabilize interactions between the  
353 substrate and active site (**Fig. S12**). Overall, our MD simulations suggest that for three of the  
354 four hyperactive variants (M222L, G218S, T012E-M222L, and T102R-M222L-D306G) the  
355 substrate more readily approaches the catalytic site forming a stable near-attack  
356 conformation. However, for N453S, our analysis revealed behavior largely unchanged from  
357 parental, suggesting that its mode of action may not involve direct modulation of interactions  
358 between substrate and catalytic residues.

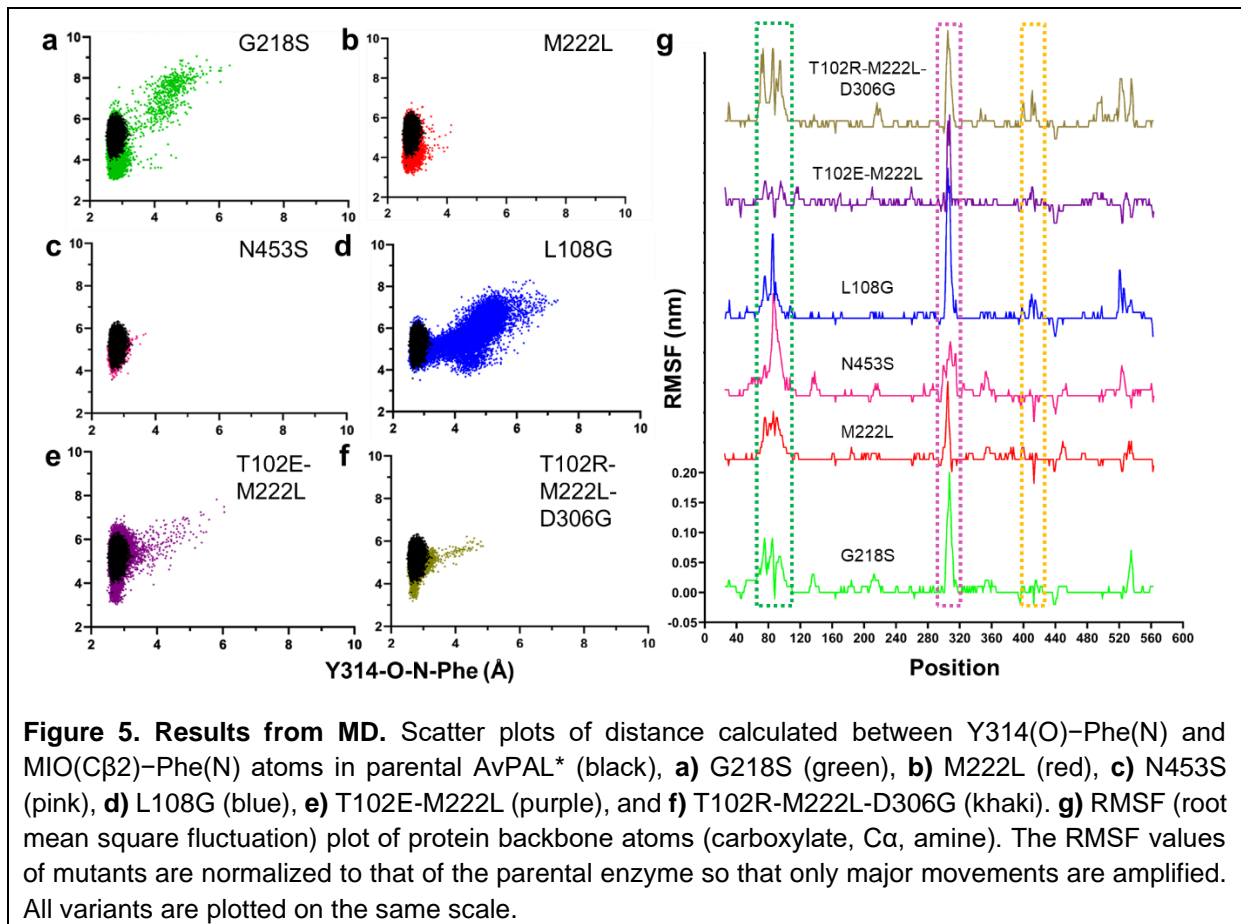

359

360 **Figure 5. Results from MD.** Scatter plots of distance calculated between Y314(O)-Phe(N) and  
361 MIO(Cβ2)-Phe(N) atoms in parental AvPAL\* (black), **a**) G218S (green), **b**) M222L (red), **c**) N453S  
362 (pink), **d**) L108G (blue), **e**) T102E-M222L (purple), and **f**) T102R-M222L-D306G (khaki). **g**) RMSF (root  
363 mean square fluctuation) plot of protein backbone atoms (carboxylate, Cα, amine). The RMSF values  
364 of mutants are normalized to that of the parental enzyme so that only major movements are amplified.  
365 All variants are plotted on the same scale.

366

367 **Steered molecular dynamics (SMD) studies show steady and seamless diffusion of Phe**  
368 **in mutant N453S.**

369 MD studies with N453S reflected behavior similar to that of parental AvPAL\*. As N453S is in  
370 the periphery (~12 Å from the active site), we suspected it impacted Phe diffusion. We  
371 therefore performed SMD of AvPAL\* and the mutant for comparison studies. One of the near  
372 attack conformations was chosen to simulate the egress path taken by the Phe from the active  
373 site. Subsequently, we used the same path as a shadow to simulate the Phe reassociation  
374 studies. With the primary force constant, both egress and the reassociation of the Phe favored  
375 substrate diffusion in N453S compared to AvPAL\* (**Fig. 6, Movie S1-S2**), details are  
376 explained in the supplementary section (**Fig. S13**). We conducted umbrella sampling as an  
377 extension of SMD studies to estimate the energetics during the translocation of the Phe in the  
378 path. A series of configuration or reaction coordinates across the path were chosen from the  
379 SMD studies and constructed based on the distance between the COM of MIO and that of the  
380 Phe. The path was discretized into multiple windows that were chosen for every 0.5 Å of the  
381 Phe movement from the active site till it reached the periphery of the protein. The umbrella  
382 sampling studies on Phe translocation sheds light on mutation N453S and the residues along  
383 the path that are responsible for the substrate stabilization and anchoring as it enters the active

384 site. The potential of mean force (PMF) graph shows that N453S has two minima, which were  
385 not observed in the AvPAL\*, at a distance of ~5–6 Å and ~10–11 Å between the COM of MIO  
386 and that of Phe (**Fig. 6a**). The conformational changes of Phe were extracted from umbrella  
387 sampling and mapped on the protein for AvPAL\* and N453S (**Fig. 6b-c**). For AvPAL\*, the path  
388 is narrow towards the active site leading to slightly constrained and energetically less favorable  
389 entry (**Fig. 6b**). The path for N453S is wider and energetically favorable, especially in a region  
390 close to the active site where the substrate shows well organized conformations projecting the  
391 amino group towards the positively charged residues (**Fig. 6f**). Due to this, the phenyl group  
392 of Phe likely enters the active site and forms a precise Michaelis complex (**Fig. S14**).  
393

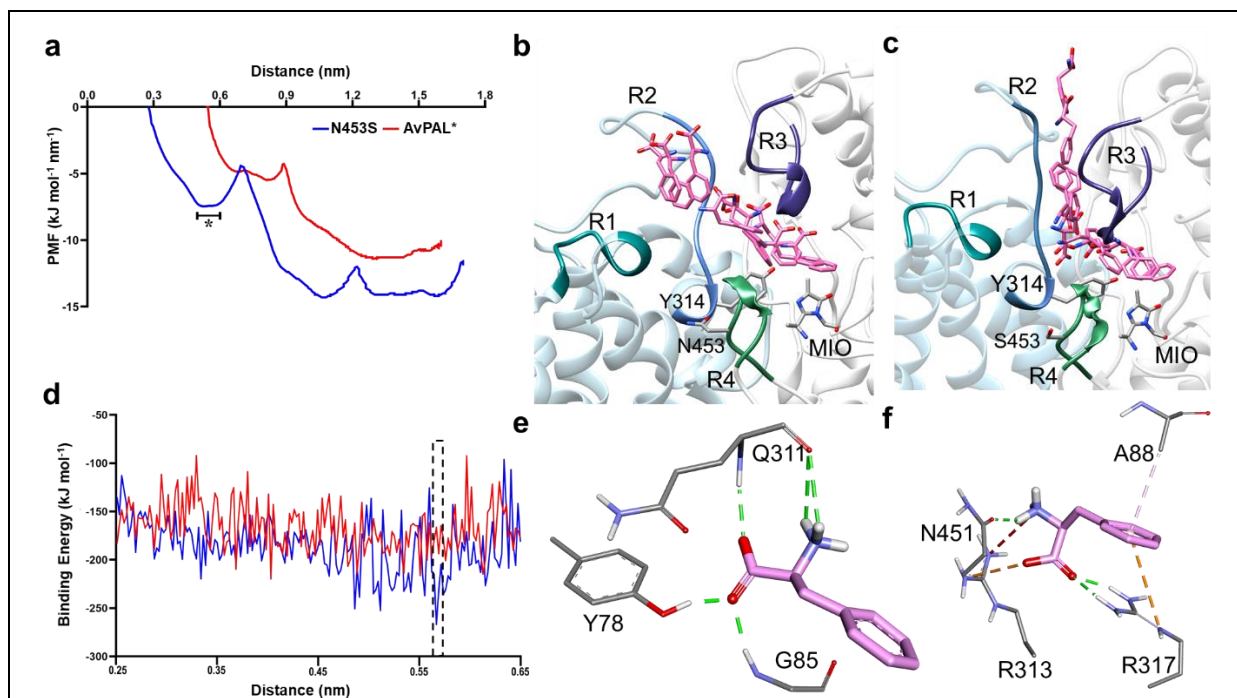

394

395 **Figure 6. Results from SMD and umbrella sampling for parental AvPAL\* and N453S. a)** The  
396 conformational transition of the substrate along the PMF profile, **b)** extracted from the parental and **c)**  
397 mutant N453S. The peripheral regions of the substrate entry path are highlighted as R1, R2, R3, and  
398 R4. They composed of residues 397–403, 308–315 of chain C and 83–94, 446–455 of chain A,  
399 respectively. The region marked in as (\*) in (a) is the free energy dip that facilitates the substrate entry  
400 in N453S. **d)** Binding free energy calculations showed higher affinity of Phe for mutant N453S. **e, f)**  
401 E-S complex extracted from free energy calculations with least binding energies for parental and mutant  
402 (dotted box in (d)) reveal that the substrate is stabilized by salt bridges and hydrogen bonds in N453S  
403 and only hydrogen bonds in the parent. Green lines show hydrogen bond interactions, orange lines are  
404 salt bridge interactions, and light pink lines are hydrophobic interactions.

405

406 In addition, we calculated the binding energy for E-S complex from region that showed  
407 differences in AvPAL\* and N453S denoted as asterisk (\*) in the PMF profile (**Fig. 6a**). The  
408 binding energy for N453S improved by ~35 kcal mol<sup>-1</sup> when compared to AvPAL\* (**Fig. 6d**).  
409 The conformation of the substrate and its interacting residues were extracted from the region

410 denoted by asterisk in **Fig. 6b–c** that represents low energy region for both AvPAL\* and  
411 N453S. In AvPAL\*, Phe was found to interact with Y78, the backbone of Q311 and G85,  
412 whereas in case of N453S, Phe showed interactions with A88, R313, and R317 (**Fig. 6e–f**).  
413 In N453S, A88 was observed to have  $\pi$ -alkyl interaction and R317 shows  $\pi$ -cationic  
414 interaction with the phenyl ring of Phe. Among electrostatic interactions, the salt bridge plays  
415 a major role in stabilizing and anchoring Phe. R313 and R317 shows salt bridge interaction  
416 with the carboxylic group and N451 interacts with the amino group of the Phe. In AvPAL\*, Phe  
417 amine interacts with the backbone of Q311, the carboxylic group interacts with the backbone  
418 nitrogen of G85 and hydroxyl group of Y78 with hydrogen bond interactions (**Fig. 6e**). We did  
419 not observe any interactions with phenyl ring that could slow movement of the substrate in  
420 either case.

421  
422 Since N453S showed improved access of the substrate Phe to the active site, we  
423 hypothesized that combining it with new variants might further improve the activity. Based on  
424 this we generated new combined variants with M222L, L4P-G218S, T102E-M222L and  
425 T102R-M222L-D306G. We purified these variants and performed the kinetic characterization  
426 (**Fig. 7a–e, Table S3**), determined the whole cell conversion of Phe to tCA (**Fig. 7f**) and growth  
427 rate (**Table S4**). We found that all the active N453S added variants displayed similar kinetic  
428 parameters as parental AvPAL\* (**Fig 7a–e, Table S3**), despite their parental counterparts  
429 having >2-fold higher activity. Further, presence of N543S in G218S and T102R-M222L-  
430 D306G backgrounds completely abolished activity (**Fig. 7c, e**). The reduced  $v_{\max}$  for all new  
431 variants was surprising because all the active N453S combinations displayed improved whole  
432 cell tCA conversion when compared to their parental counterparts (**Fig. 7f**). In fact, T102E-  
433 M222L-N453S gave >6-fold higher conversion of Phe to tCA when compared to AvPAL\* (**Fig.**  
434 **7f**). Since the SMD studies suggested more favorable substrate ingress in N453S, we  
435 hypothesized that Phe may more readily displace tCA from the active site, reducing product  
436 inhibition, a known issue with PALs<sup>42-44</sup> and may explain higher fitness in cellular context. To  
437 test this, we determined the activity of AvPAL\*, N453S, T102E-M222L and T102E-M222L-  
438 N453S in the presence and absence of 150  $\mu$ M tCA (**Fig. S15**). We found that in both cases,  
439 the N453S variants were less inhibited by tCA. Since T102E-M222L-N453S displayed 6-fold  
440 better whole cell conversion of Phe to tCA, it might be a good potential candidate for bacterial-  
441 or cell-encapsulated enzyme-replacement therapy for PKU.

442

#### 443 **QM/MM reveals stabilization of the transition state in the hyperactive active mutants.**

444 Although two reaction mechanisms have been proposed for PALs that proceed either through  
445 a Friedel-Crafts (FC) like intermediate<sup>45</sup> or an N-MIO adduct<sup>30</sup>, there is increasing support for  
446 the latter<sup>25</sup>. So, we simulated the N-MIO adduct reaction mechanism that involves formation

447 of near attack conformation where Phe is oriented suitably for proton abstraction by the  
 448 hydroxyl group of Y314 (**Fig S10a-b**). This deprotonation results in formation of the  
 449 nucleophilic amino moiety activating Phe for interaction with electrophilic MIO<sup>30</sup>. These  
 450 rearrangements are referred to as the first step. The starting point of the E-S complex derived  
 451 from well equilibrated MD simulations (1  $\mu$ s simulations), shows the least distance between  
 452 reactive groups, i.e., Y314(O)-Phe(N) and MIO(C $\beta$ 2)-Phe(N). To get the least distance  
 453 between the reactive groups for the QM/MM simulation, we scanned across the MD simulation  
 454 and this E-S coordinate (MD-ES, **Table S5**) for the distance between the combined center of  
 455 mass (COM) of MIO and Y314 and that of the amino group of the substrate.  
 456

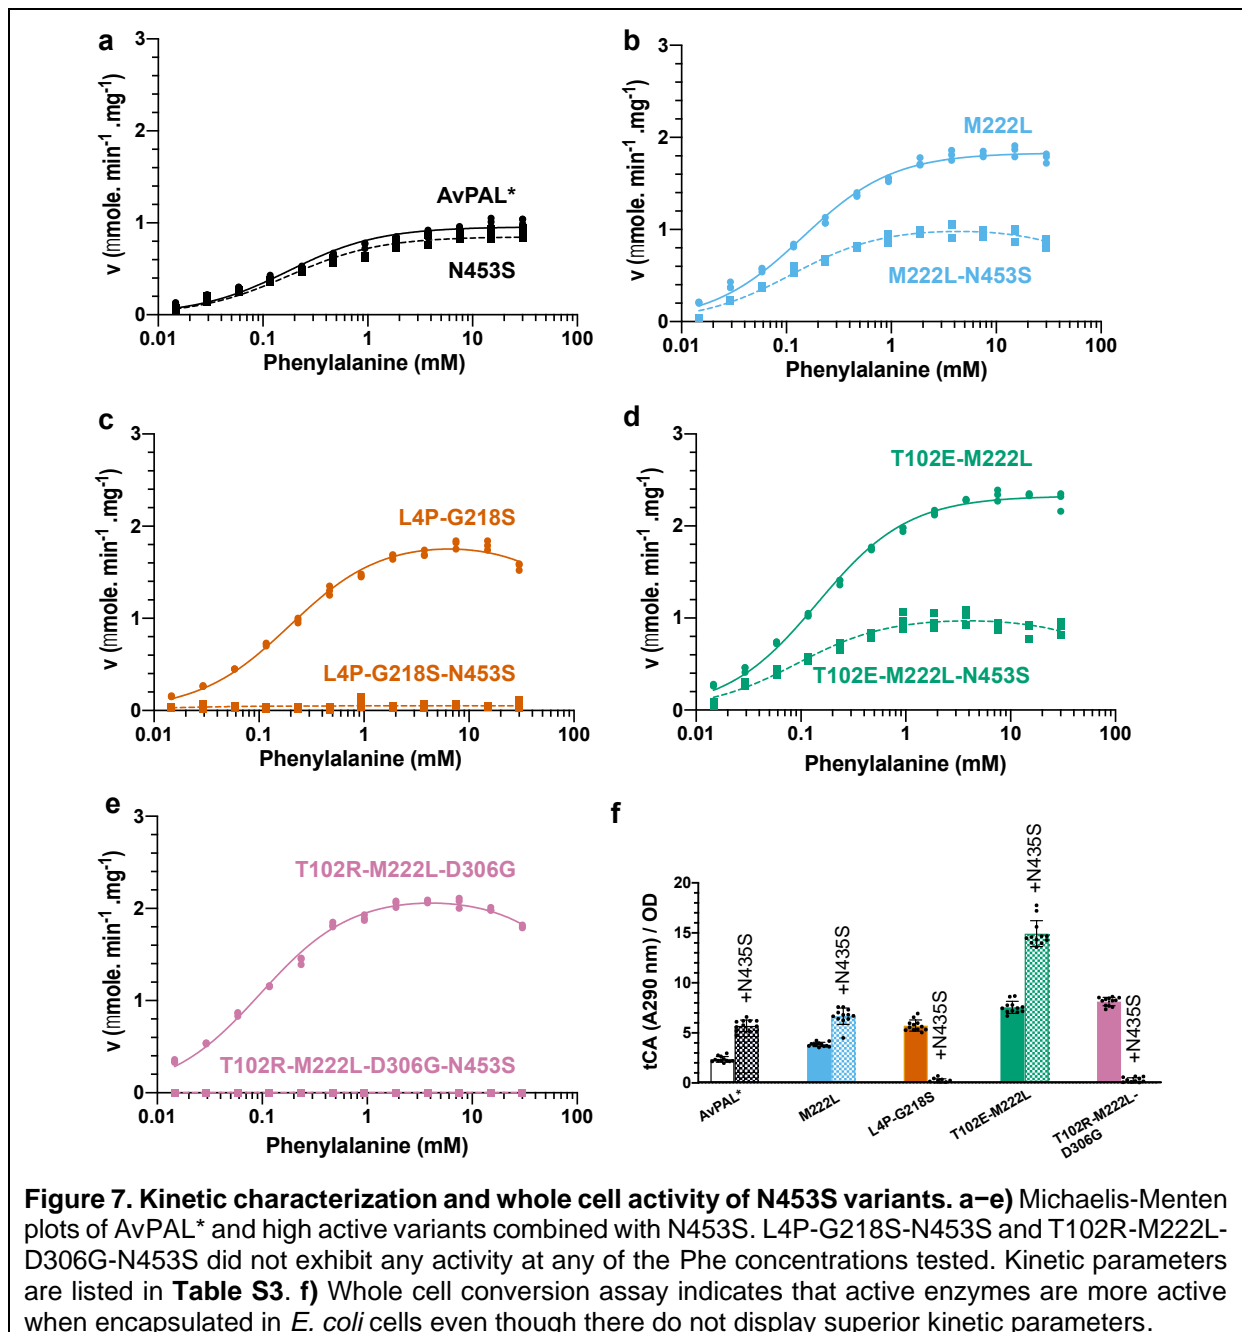

457

458 **Figure 7. Kinetic characterization and whole cell activity of N453S variants. a-e)** Michaelis-Menten  
 459 plots of AvPAL\* and high active variants combined with N453S. L4P-G218S-N453S and T102R-M222L-  
 460 D306G-N453S did not exhibit any activity at any of the Phe concentrations tested. Kinetic parameters  
 461 are listed in **Table S3. f)** Whole cell conversion assay indicates that active enzymes are more active  
 462 when encapsulated in *E. coli* cells even though there do not display superior kinetic parameters.



463  
464 All forms of quantum chemical calculations performed in this study were to delineate the  
465 reaction pathway and free-energy barrier for first step of proton abstraction and the  
466 intermediate state 1 (IS1) formation where the substrate amine forms an attack conformation  
467 with MIO(C $\beta$ 2) (**Fig. 8**). First step of the investigation based on the generally proposed  
468 mechanism as shown in **Fig. S16**. We obtained the detailed reaction mechanism, the  
469 optimized structures of transition states and intermediates which are shown in **Fig. 8a-c** and  
470 the calculated overall relative free energy graph is given in **Fig. 8d**. To understand the  
471 mechanism, we implemented the new functionality by NAMD that can execute multiple QM  
472 regions in parallel<sup>46</sup>. All four active sites of PAL were treated under QM code simultaneously  
473 while the rest of the protein was treated under MM force field (**Fig. S17**). The E-S complex is  
474 defined as the zero-point Ground state (GS, 0 kcal mol<sup>-1</sup>) to which all other energies are  
475 compared for each mutation. To define the attack conformation from Michaelis complex, we  
476 conducted QM/MM using PM7 function by including active site residues Y314, Q452, R317,  
477 MIO, and Phe until the distance between the Y314(O) and substrate amine approached ~1.5  
478 Å (**Table S6**). The distance we observed is similar to that derived by QM/MM on TAL from  
479 *Rhodobacter capsulatus*<sup>47</sup> and crystal structure from PcPAL<sup>25</sup>. This was used as starting point  
480 reaction coordinates for transition state (TS) optimization using higher level QM/MM  
481 simulations based on B3LYP def2-SVP D4 TS. TS and IS were studied till the substrate H<sup>+</sup>  
482 were abstracted by Y314, and then until the Phe moved to an optimum attack conformation  
483 with MIO. We observed the following sequence of events in the first step of the reaction in  
484 parental AvPAL\*. After the near-attack conformation was formed, the bond between the  
485 Y314(O) and abstracted H<sup>+</sup> was stretched from 1.04 Å to 1.21 Å and at the same time, the  
486 carboxyl oxygen of the Phe abstracts the H<sup>+</sup> from Y314. First transition state (TS1) is formed  
487 when the H<sup>+</sup> from the amino nitrogen is stretched to 1.28 Å, before being completely extracted  
488 by Y314, followed by a small conformational change in the Phe that brings it closer to MIO to  
489 form IS1. For all the tested mutations same events were observed for the first step but the  
490 mutations showed different energies for the TS1 and IS1. The energies for both the TS1 and  
491 IS1 correlated with the experimental data and the energies can be graded as L108G < AvPAL\*  
492 < M222L < G218S < T102E-M222L < T102R-M222L-D306G and suggest that formation of IS1  
493 through TS1 may be rate-limiting in AvPAL\* but shifts to a downstream step in all mutants  
494 other than N453S (**Fig. S18**). The conformational changes observed in during the formation  
495 of the IS1 is described in supplementary information and **Fig. S19**.

496  
497 Next, to understand the barrier-crossing events shown in the QM/MM simulations in depth, we  
498 conducted hybrid QM/MM techniques combined with metadynamics, which enhances the  
499 sampling of coordinates relevant to the reaction. This way we can observe how the system

500 accelerates across the reaction barriers by itself and escapes from local minima (**Fig. S20**).  
 501 We further characterized the TS1 and IS1 structures by transition path sampling (TPS)  
 502 simulations, and this was plotted over the free energy surface (FES). FES and TPS derived  
 503 from QM/MM metadynamics could clearly differentiate the mutants and AvPAL\* and showed  
 504 thermodynamically favorable energy paths for T102E-M222L and T102R-M222L-D306G  
 505 (details in supplemental information, **Fig. S20**).  
 506

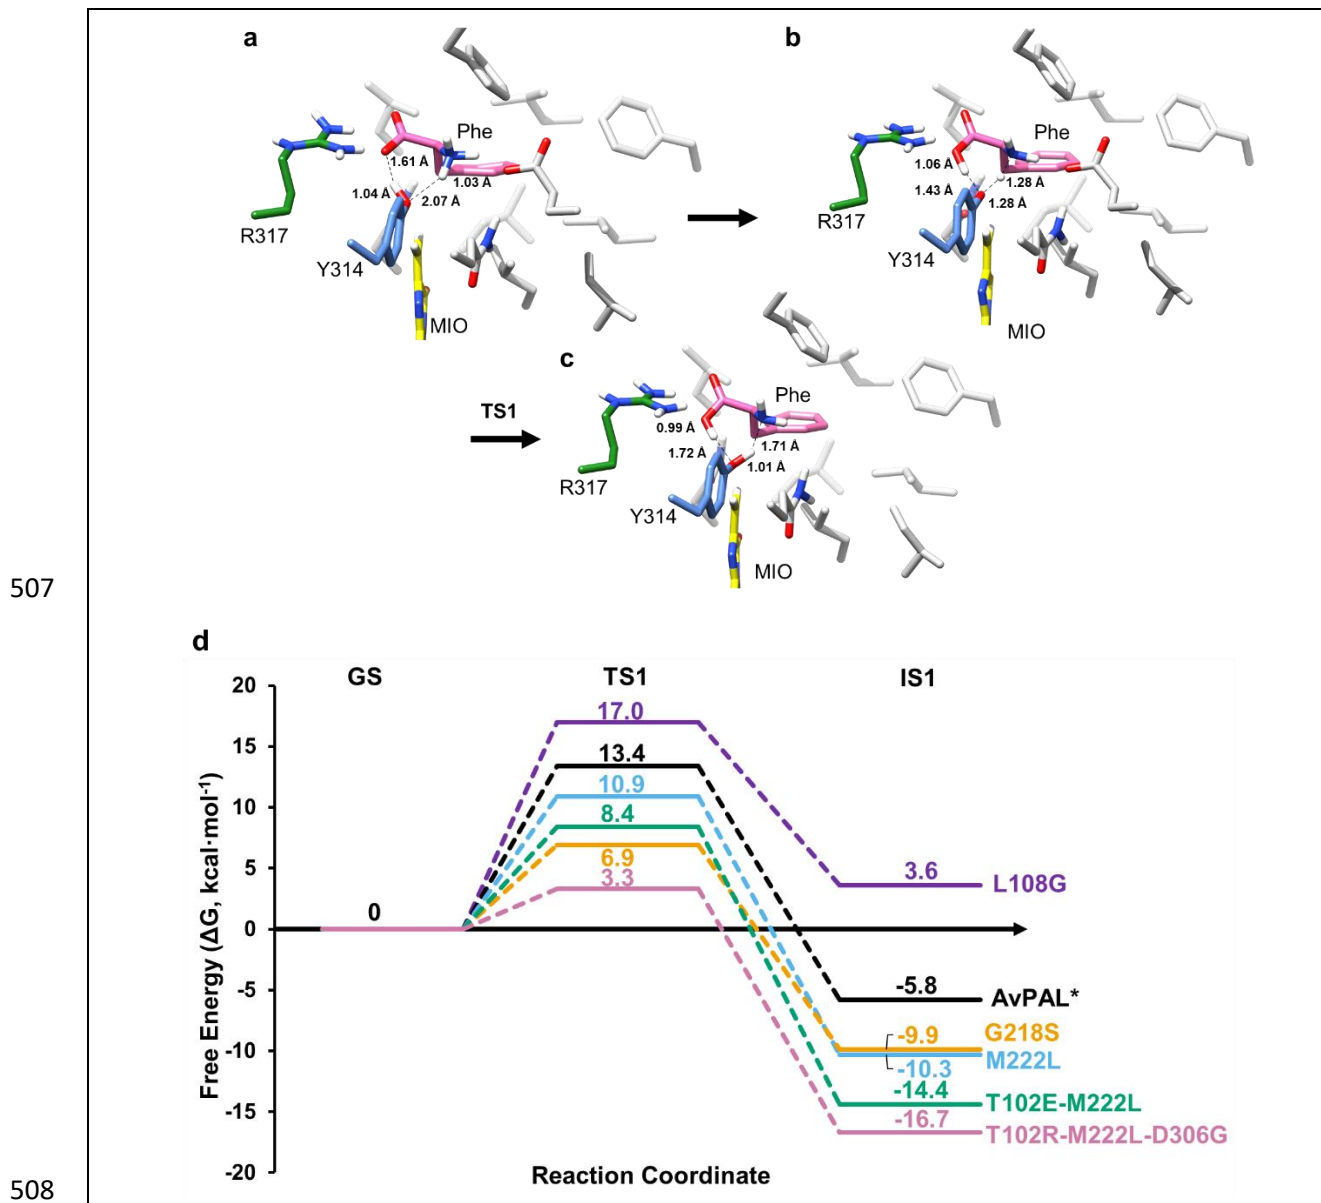

508 **Figure 8. QM/MM studies on AvPAL\* variants.** Proposed reaction mechanism. **a-c)** Transition states  
 509 for the first step of the reaction, where proton transfer takes place, with Phe (pink), MIO (yellow),  
 510 catalytic Y314 (blue), and R317 (green), and other protein residues (light grey) as stick models. Only  
 511 polar hydrogens are shown for clarity. All distances are in Å. **d)** Relative energy landscape for AvPAL\*  
 512 (black), M222L (red), G218S (blue), L108G (green), T102E-M222L (pink), and T102R-M222L-D306G  
 513 (cyan) for all the steps from ground state (GS) to IS1. Energies along paths are not to scale.  
 514  
 515

516 **CONCLUSIONS.**

517 In summary, we report the most extensive sequence-function analysis of an MIO-containing  
518 enzyme, AvPAL\*, that leveraged a growth-coupled HTS. The outcomes of DMS guided  
519 identification of mutants that enhance native PAL activity. Further, by performing  
520 computational studies (QM/MM, MD, steered MD + QMM/MM), we identified the mechanisms  
521 through which the mutations enhanced enzyme activity, which in turn, allowed us to identify  
522 variants that have promising applications to cell-free biocatalysts (T102E-M222L, T102R-  
523 M222L-D306G) and cell-based systems (T102R-M222L-N453S). Not only does this  
524 significantly advance enzymology and engineering of PALs, but also demonstrates the power  
525 of using DMS to guide basic and applied enzymology.

526

527 **METHODS.**

528 **Strains and general techniques for DNA manipulation.**

529 AvPAL\* error prone library enriched previously was used in the current study<sup>17</sup>. PCR was  
530 performed using Phusion DNA polymerase or Platinum™ SuperFi II Green PCR Master Mix  
531 (ThermoFisher Scientific). *E. coli* NEB5α (New England Biolabs) was used for plasmid  
532 propagation and *E. coli* MG1655 *rph+* was used for screening of libraries and purification of  
533 recombinant AvPAL\* and its mutants. Sequences of constructed plasmids were confirmed  
534 through DNA sequencing (Genewiz). AvPAL\* was expressed under constitutive T5 promoter  
535 from plasmid pBAV1k carrying chloramphenicol resistance.

536

537 **Next generation sequencing (NGS) of library and data processing.**

538 Plasmid libraries and PCR products were outsourced to Genewiz (New Jersey, USA) for  
539 sequencing on Illumina MiSeq Nextra paired end sequencing platform (2 × 250 bp). For all the  
540 samples sequenced we received 1–5 million reads with average length of 160 bp after  
541 trimming. The bioinformatic workflow is depicted in **Fig. S21**. Briefly, the raw fastQ files were  
542 evaluated for quality score, read length, adaptor and duplicate read content using FastQC  
543 package. Subsequent analysis was performed using Geneious Prime® 2020.2.4. The reads  
544 were paired and merged using BBMerge package<sup>48</sup>, filtered for adaptor sequences, short and  
545 poor-quality reads using BBDuk package. The reads were then mapped onto reference gene  
546 (AvPAL\*) using BowTie2 package<sup>49</sup>. The mapped reads were then analyzed for single  
547 nucleotide variants to detect mutations. This variant call file was used to calculate the fitness  
548 score using **Eqn 1**.

549 
$$Lv = \ln \frac{Cv,sel+0.5}{Cwt,sel+0.5} - \ln \frac{Cv,inp+0.5}{Cwt,inp+0.5} \quad \dots \text{Equation 1}$$

550 The fitness values thus determined were represented using heatmap to show the residues  
551 with positive and negative fitness.

552

553 **Physical linking of distal mutations for amplicon sequencing.**

554 Workflow followed for physical linkage of G218, M222 and N453 is indicated in **Fig. S22**.  
555 Briefly, region immediate downstream to M222 and immediate upstream to N453 was  
556 amplified with primers having homologous region. The amplicon flanked by homologous  
557 region was sealed using NEB-HiFi assembler. The circular plasmid was then used as a  
558 template to amplify ~300 bp region spanning G218-N453. The segment was amplified using  
559 primers with illumine sequencing overhangs. The amplicon was sequenced using AmpliconEZ  
560 Seq Illumina platform at Genewiz.

561

562 **Construction of site saturation mutagenesis (SSM) libraries.**

563 pBAV1k plasmid containing AvPAL\* was used as template for constructing the site saturation  
564 libraries. The SSM libraries for seven sites of interest were constructed in three ways; i)  
565 individual sites using NNS codon at the target location was constructed following  
566 QuickChange-like method. Briefly, partially overlapping primers were used to perform inverse  
567 PCR, the amplicon was subjected to DpnI (NEB) digestion to remove the parental plasmid  
568 followed by NEBHiFi assembly (NEB) to assemble and seal the overlapping ends for improved  
569 transformation efficiency. The assembled product was purified using PCR clean-up kit and  
570 electroporated into MG1655 *rph+*. ii) A new approach of scaling by mutation was developed  
571 to mutate three sites in varying combination. In this approach, the clean-up product from  
572 approach i) was pooled in equimolar amounts and used as template for second round of  
573 inverse PCR using seven primer pairs individually. This process was repeated total of three  
574 times to generate the <sup>7</sup>C<sub>3</sub> SSM library which was transformed into *E. cloni* DH10B (Lucigen)  
575 for achieving large library size. iii) The third library was constructed by using restricted codon  
576 at the seven sites of interest – <sup>7</sup>C<sub>7</sub>. The restricted codon was chosen based on the DMS data  
577 from error prone PCR library screen (**Table S7**). The fragments were assembled using NEB  
578 HiFi assembler and electroporated into *E. cloni* DH10B after PCR clean-up. The plasmid  
579 library from approach ii) and iii) were isolated from *E. cloni* and transformed into *E. coli*  
580 MG1655 *rph+* enrichment on minimal media containing 30 mM Phe. Fitness data for these  
581 libraries were obtained by sequencing the seven sites of interest using AmpliconEZ seq  
582 (Genewiz). The data was processed as described in a manner described above.

583

584 **Enzyme assay, purification, and kinetic characterization.**

585 PAL activity was monitored by measuring the production of tCA at 290 nm over time. Briefly,  
586 200 µL reaction as performed by 1 µg of purified enzyme to pre-warmed PBS containing 30  
587 mM Phe. The assay was performed in 96-well F-bottom UVStar (Greiner Bio-One,  
588 Kremsmünster, Austria) microtiter plate and absorbance at 290 nm was measured every 15 s  
589 at 37 °C using a SpectraMax M3 (Molecular Devices) plate reader.

590

591 For purification, the enzyme was isolated from 25 mL culture. The pellet was washed once  
592 with PBS and resuspended in 500 µL PBS. This cell suspension was sonicated on ice using  
593 a Sonifier SFX 150 (Branson Ultrasonics, Danbury, CT) (10 s ON; 1 min OFF; 2 min; 40 %),  
594 and cell debris was separated from the lysate by centrifuging at 20,000 × g for 10 min at 4°C.  
595 As each construct included a N-term His-tag, the enzyme was purified via immobilized metal  
596 affinity chromatography (IMAC) purification. Briefly, the lysate was loaded onto HisPur™ Ni-  
597 NTA Spin Plates (ThermoFisher Scientific) and incubated for 2 min. After being washed four

598 times equilibration buffer, pure protein was then eluted using 200  $\mu$ L of Elution buffer (300 mM  
599 NaCl, 50 mM NaH<sub>2</sub>PO<sub>4</sub>, 500 mM imidazole, pH 8.0). Elution fractions were then dialyzed  
600 using Tube-O-Dialyser tubes (1 kDa MWCO, Geno-Tech). Protein concentration was  
601 estimated by Bradford reagent (VWR) using bovine serum albumin (BSA) as the standard.  
602 For kinetic analysis, AvPAL\* and selected mutants were purified and assayed as described  
603 above. The activity was measured at twelve concentrations of Phe ranging from 15  $\mu$ M to 30  
604 mM in PBS, pH 7.4 (PBS) at 37 °C. A Michaelis-Menten curve was fit in GraphPad Prism  
605 software using the initial rate at each Phe concentration.

606

### 607 **Modelling and induced-fit conformation sampling/enzyme-substrate interaction** 608 **studies.**

609 3D structure of the PAL enzyme from *Anabaena variabilis* chosen (PDB ID: 2NYN). The  
610 structure had 2 missing regions (Residues 74-92, 302-309) which were modelled using  
611 MODELLER<sup>50</sup>. The PAL structure with the least DOPE Score was selected and chosen for  
612 further studies. The binding conformation of phenylalanine is not identified in any AvPAL\*  
613 crystal structures. To compensate, Phe was docked in the active site of the modelled AvPAL\*  
614 structure using Autodock4 tool<sup>51</sup>. An energetically and structurally feasible conformation was  
615 chosen for the interaction studies and structural analysis in Chimera. The binding energy was  
616 found to be  $-3.03$  kcal mol<sup>-1</sup> for the E-S complex.

617

### 618 **Molecular dynamics (MD) simulations.**

619 MD simulation was conducted for AvPAL\* and mutant complexes from the interaction studies.  
620 The complexes were taken into a system using the AMBER99SB<sup>52</sup> force field as implemented  
621 in GROMACS<sup>53-57</sup> tools. The complex was placed in a box of volume 1000 nm<sup>3</sup> and then  
622 solvated with  $\sim 26,230$  water molecules. To emulate conditions similar to in vitro experiments,  
623 a salt concentration of 0.15 M NaCl was incorporated into the solvated system. This has the  
624 added benefit of neutralizing the charge of the system. The LINCS was employed to constrain  
625 bond length and fix all bonds containing hydrogen atoms. Berendsen thermostat<sup>58</sup> was chosen  
626 to control the temperature at 310 K. The Particle-mesh Ewald algorithm (PME)<sup>59</sup> was used to  
627 calculate electrostatic interactions with a 10 Å cut-off. The V-rescale and the Parrinello–  
628 Rahman algorithms was applied to couple the temperature and pressure. Energy minimization  
629 of the system was obtained using the steepest descent algorithm with a tolerance value of  
630 1000 kJ mol<sup>-1</sup> nm<sup>-1</sup> in 1000 steps. The minimized system was equilibrated for 1 ns each of  
631 constant volume and constant pressure ensemble. The system was then subject to a  
632 production run of 500 ns at 1 atm pressure and 310 K, twice for statistical significance. The  
633 coordinates obtained from the production run were used for post-simulation analysis to  
634 observe the effect of the mutations on the dynamics of the protein. The distances between

635 MIO methyldene atom and substrate amino nitrogen (MIO(C $\beta$ 2)–Phe(N)) and Y314 hydroxyl  
636 oxygen and substrate amino nitrogen (Y314(O)–Phe(N)) were considered and plot against  
637 each other as a scatter plot. Backbone atoms of domains around the active site were  
638 considered to calculate Root mean square fluctuation (RMSF).

639

#### 640 **Metadynamics-based MD simulations.**

641 Metadynamics simulations were performed to understand the free energy landscape of the  
642 active site. On completion of simulations, the substrate was expected to find different potential  
643 minima to attain near attack conformation in the active site. Comparative studies were  
644 conducted for AvPAL\* and mutations. In metadynamics based approaches, the choice of a  
645 collective variable (CV) in the design of the experiment is crucial. We chose two CVs i.e.,  
646 distance between COM (center of mass) of substrate atoms and COM of Y314 atoms (CV1),  
647 and distance between COM of substrate atoms and COM of heavy atoms in the backbone of  
648 residues in conserved secondary structures that were present within 5 Å of G218, M222 and  
649 L108 residues (CV2) (**Fig. S12a**).

650

#### 651 **Steered molecular dynamics (SMD) studies.**

652 SMD simulations were conducted to identify conformational changes and associated path  
653 samplings when the substrate is exposed to mechanical strain or rupture force, which cannot  
654 be achieved through standard MD simulations. Well equilibrated systems were chosen to be  
655 starting points for the SMD studies. The pulling simulations were implemented using  
656 GROMACS tools. Substrate was pulled by its COM away from the active site and pulled  
657 towards COM of MIO group in unbinding and reassociation process, respectively. The pull  
658 velocity of 0.0005 nm<sup>-1</sup> ps<sup>-1</sup> with the bias force constant of 310 kJ mol<sup>-1</sup>nm<sup>-2</sup> and -30 kJ mol<sup>-1</sup>  
659 nm<sup>-2</sup> were used in unbinding and entry process, respectively. Umbrella sampling were  
660 conducted as an extension of SMD studies to estimate the energetics during the translocation  
661 of the substrate in the path. A series of configuration or reaction coordinates across the path  
662 were chosen from the SMD studies and constructed based on the distance between the COM  
663 of MIO and that of the substrate. The path was discretized into multiple windows which were  
664 chosen for every 0.5 Å of the substrate movement from the active site till it reaches the  
665 periphery of the protein.

666

#### 667 **QM/MM simulation.**

668 E-S complexes were placed in a cubic box with a solute-solvent separation margin of 12 Å in  
669 each dimension, by means of QwikMD<sup>60</sup> program implemented in VMD. The electroneutrality  
670 of the system was maintained by the adding NaCl to maintain a salt concentration of 0.15 M.  
671 CHARMM36 forcefield was used for the protein topology (generated using psfgen and autopsf

672 programs) and TIP3P water models were used in the system. During the simulations, a 12.0 Å  
673 cut-off was applied to short-range, non-bonded interactions, whereas long-range electrostatic  
674 interactions are treated using the particle-mesh Ewald (PME) method. The equations of  
675 motions were integrated using the r-RESPA multiple time step scheme to update the short-  
676 range interactions every step and long-range interactions every two steps. The time step of  
677 integration was set to be 2 fs for all simulations performed. Thermal equilibrations were  
678 conducted by first subjecting the system to energy minimization using the conjugated  
679 gradients method for 1000 steps (2 ps) and then coupled with a heat bath kept constant at  
680 300 K by the Langevin thermostat with a collision coefficient of 1 ps<sup>-1</sup> and a barostat  
681 maintained at 1 atm.

682

683 The last step of classical equilibrium was taken to QM/MM interface to select QM region and  
684 initiate QM/MM simulation using QwikMD interface provided in VMD. Four regions in different  
685 chains constituting MIO adduct, Q452, Y314, substrate and water molecules within 3.5 Å of  
686 the MIO were selected as QM regions, the total charge for each QM region was maintained  
687 between +1 and -1 for effective Semi-Empirical QM Calculations.

688

689 The system was optimized by a 1,000 steps minimization, followed by 10,000 steps of  
690 simulated annealing calculation, equilibration and subjected to an average of 5000 ps QM/MM  
691 hybrid production run using PM7<sup>61</sup> together with the CHARMM36 force field. The least  
692 distance between the reactive groups were considered as the good guess of the transition  
693 state geometry. This was followed by an average of 1000 ps QM/MM hybrid production run  
694 using PM7-TS. Simultaneously, an average of 1000 ps density function theory (DFT) based  
695 QM/MM hybrid production at B3LYP/ 6-31G(d) level def2-SVP level implemented in ORCA<sup>62</sup>  
696 was carried out and NEB-TS was used to find and optimize TS. Three input files were provided  
697 for the purposes of the QM/MM hybrid production run i.e., i) initial conformation from well  
698 equilibrated MD, ii) the transition state geometry derived from QMMM-PM7 and the final  
699 product (refer IS1 in **Fig. 8**) that was manually modelled using the transition state geometry,  
700 equilibrated using QMMM-PM7 simulation.

701

702 The mutants and the AvPAL\* were subjected to QM/MM simulation protocol. In this report only  
703 the first step of the reaction and their corresponding energy values of PM7-TS are reported.  
704 DFT calculations were used only for validating the reaction coordinates of the transition states  
705 and the intermediate state.

706



707 **QM/MM Metadynamics.**

708 5000 ps equilibrated QM/MM reaction coordinate of the E-S was used as initial input structure  
709 for the metadynamics simulations. QM/MM-metadynamics simulations was carried out at 300  
710 K, 1 bar, 0.5 fs time step and periodic boundary conditions for 1000 ps using NAMD 2.13<sup>46</sup>  
711 and colvars module<sup>63</sup>. The distance between amino-nitrogen of the substrate & hydroxyl-  
712 oxygen of Y314 and distance between amino-nitrogen of the substrate and methyldene  
713 carbon of MIO adduct were used as two collective variables (CVs). Gaussians of height 0.2  
714 kcal/mol were added onto the CV coordinate at every step to construct metadynamics bias  
715 potential with width of 1°. QM/MM hybrid production run using PM7-TS integrator.

716

717 **DATA AVAILABILITY.**

718 Deep sequencing data has been submitted to NCBI SRA and is available under accession #  
719 PRJNA730338.

720

721 **CODE AVAILABILITY.**

722 All open-source and commercial software used are described in the methods section.

723

724 **ACKNOWLEDGEMENTS.**

725 The authors would like to thank current and former Nair lab members, Dr. Zachary J. S.  
726 Mays, Dr. Debika Choudhury, Sean F. Sullivan, Trevor B. Nicks, Rana Said, Maya  
727 Vaishnav, and Alexis Barselau for helpful discussions.

728

729 **AUTHOR CONTRIBUTIONS.**

730 N.U.N., K.M., T.C.C., and V.D.T. conceived the idea, N.U.N., T.C.C., V.D.T. designed the  
731 research project and T.C.C., V.D.T., N.B.K., A.S., G.G.S., P.K.R., N.U.N. co-wrote the  
732 manuscript. T.C.C., V.D.T., K.M., and A.R. performed the experiments. T.C.C. and V.D.T.  
733 analyzed the data. N.B.K., A.S., G.G.S., P.K.R. performed analysis of the computational  
734 results. All the authors have reviewed the manuscript and approved it for submission.

735

736 **COMPETING INTERESTS.**

737 Authors (N.U.N., V.D.T., T.C.C., K.M.) and Tufts University have applied for a patent on the  
738 workflow and enhanced activity variants.

739 **REFERENCES.**

740

- 741 1 Kong, J.-Q. Phenylalanine ammonia-lyase, a key component used for phenylpropanoids  
742 production by metabolic engineering. *RSC advances* **5**, 62587-62603 (2015).
- 743 2 Parmeggiani, F., Weise, N. J., Ahmed, S. T. & Turner, N. J. Synthetic and therapeutic  
744 applications of ammonia-lyases and aminomutases. *Chemical reviews* **118**, 73-118 (2018).
- 745 3 Klumbys, E., Zebec, Z., Weise, N. J., Turner, N. J. & Scrutton, N. S. Bio-derived production of  
746 cinnamyl alcohol via a three step biocatalytic cascade and metabolic engineering. *Green*  
747 *Chemistry* **20**, 658-663 (2018).
- 748 4 Toogood, H. S. & Scrutton, N. S. Discovery, characterization, engineering, and applications of  
749 ene-reductases for industrial biocatalysis. *ACS catalysis* **8**, 3532-3549 (2018).
- 750 5 Parmeggiani, F., Lovelock, S. L., Weise, N. J., Ahmed, S. T. & Turner, N. J. Synthesis of D-and l-  
751 phenylalanine derivatives by phenylalanine ammonia lyases: a multienzymatic cascade  
752 process. *Angewandte Chemie* **127**, 4691-4694 (2015).
- 753 6 Weise, N. J. *et al.* Zymophore identification enables the discovery of novel phenylalanine  
754 ammonia lyase enzymes. *Scientific reports* **7**, 1-9 (2017).
- 755 7 Zhang, F., Ren, J. & Zhan, J. Identification and Characterization of an Efficient Phenylalanine  
756 Ammonia-Lyase from *Photobacterium luminescens*. *Applied Biochemistry and Biotechnology*  
757 **193**, 1099-1115 (2021).
- 758 8 Moffitt, M. C. *et al.* Discovery of two cyanobacterial phenylalanine ammonia lyases: kinetic  
759 and structural characterization. *Biochemistry* **46**, 1004-1012 (2007).
- 760 9 Isabella, V. M. *et al.* Development of a synthetic live bacterial therapeutic for the human  
761 metabolic disease phenylketonuria. *Nature biotechnology* **36**, 857-864 (2018).
- 762 10 Burton, B. K. *et al.* Pegvaliase for the treatment of phenylketonuria: Results of the phase 2  
763 dose-finding studies with long-term follow-up. *Molecular genetics and metabolism* **130**, 239-  
764 246 (2020).
- 765 11 Yang, J. *et al.* Thermosensitive micelles encapsulating phenylalanine ammonia lyase act as a  
766 sustained and efficacious therapy against colorectal cancer. *Journal of biomedical*  
767 *nanotechnology* **15**, 717-727 (2019).
- 768 12 Babich, O. O., Pokrovsky, V. S., Anisimova, N. Y., Sokolov, N. N. & Prosekov, A. Y.  
769 Recombinant l-phenylalanine ammonia lyase from *Rhodospiridium toruloides* as a potential  
770 anticancer agent. *Biotechnology and Applied Biochemistry* **60**, 316-322 (2013).
- 771 13 Bartsch, S. & Bornscheuer, U. T. Mutational analysis of phenylalanine ammonia lyase to  
772 improve reactions rates for various substrates. *Protein Engineering, Design & Selection* **23**,  
773 929-933 (2010).
- 774 14 Bencze, L. C. *et al.* Expanding the substrate scope of phenylalanine ammonia-lyase from  
775 *Petroselinum crispum* towards styrylalanines. *Organic & biomolecular chemistry* **15**, 3717-  
776 3727 (2017).
- 777 15 Nagy, E. Z. *et al.* Mapping the hydrophobic substrate binding site of phenylalanine ammonia-  
778 lyase from *Petroselinum crispum*. *ACS Catalysis* **9**, 8825-8834 (2019).
- 779 16 Flachbart, L. K., Sokolowsky, S. & Marienhagen, J. Displaced by deceivers: prevention of  
780 biosensor cross-talk is pivotal for successful biosensor-based high-throughput screening  
781 campaigns. *ACS synthetic biology* **8**, 1847-1857 (2019).
- 782 17 Mays, Z. J., Mohan, K., Trivedi, V. D., Chappell, T. C. & Nair, N. U. Directed evolution of  
783 *Anabaena variabilis* phenylalanine ammonia-lyase (PAL) identifies mutants with enhanced  
784 activities. *Chemical Communications* **56**, 5255-5258 (2020).
- 785 18 Fowler, D. M. *et al.* High-resolution mapping of protein sequence-function relationships.  
786 *Nature methods* **7**, 741 (2010).
- 787 19 Hietpas, R. T., Jensen, J. D. & Bolon, D. N. Experimental illumination of a fitness landscape.  
788 *Proceedings of the National Academy of Sciences* **108**, 7896-7901 (2011).

- 789 20 Wrenbeck, E. E., Faber, M. S. & Whitehead, T. A. Deep sequencing methods for protein  
790 engineering and design. *Current opinion in structural biology* **45**, 36-44 (2017).
- 791 21 Wrenbeck, E. E., Azouz, L. R. & Whitehead, T. A. Single-mutation fitness landscapes for an  
792 enzyme on multiple substrates reveal specificity is globally encoded. *Nature communications*  
793 **8**, 1-10 (2017).
- 794 22 Jones, E. M. *et al.* Structural and functional characterization of G protein-coupled receptors  
795 with deep mutational scanning. *Elife* **9**, e54895 (2020).
- 796 23 McLaughlin Jr, R. N., Poelwijk, F. J., Raman, A., Gosal, W. S. & Ranganathan, R. The spatial  
797 architecture of protein function and adaptation. *Nature* **491**, 138-142 (2012).
- 798 24 Araya, C. L. *et al.* A fundamental protein property, thermodynamic stability, revealed solely  
799 from large-scale measurements of protein function. *Proceedings of the National Academy of*  
800 *Sciences* **109**, 16858-16863 (2012).
- 801 25 Bata, Z. *et al.* Substrate Tunnel Engineering Aided by X-ray Crystallography and Functional  
802 Dynamics Swaps the Function of MIO-Enzymes. *ACS Catalysis* **11**, 4538-4549 (2021).
- 803 26 Brenan, L. *et al.* Phenotypic characterization of a comprehensive set of MAPK1/ERK2  
804 missense mutants. *Cell reports* **17**, 1171-1183 (2016).
- 805 27 Calabrese, J. C., Jordan, D. B., Boodhoo, A., Sariaslani, S. & Vannelli, T. Crystal structure of  
806 phenylalanine ammonia lyase: multiple helix dipoles implicated in catalysis. *Biochemistry* **43**,  
807 11403-11416 (2004).
- 808 28 Heberling, M. M. *et al.* Ironing out their differences: dissecting the structural determinants  
809 of a phenylalanine aminomutase and ammonia lyase. *ACS chemical biology* **10**, 989-997  
810 (2015).
- 811 29 Hermes, J. D., Weiss, P. M. & Cleland, W. Use of nitrogen-15 and deuterium isotope effects  
812 to determine the chemical mechanism of phenylalanine ammonia-lyase. *Biochemistry* **24**,  
813 2959-2967 (1985).
- 814 30 Jun, S.-Y. *et al.* Biochemical and structural analysis of substrate specificity of a phenylalanine  
815 ammonia-lyase. *Plant physiology* **176**, 1452-1468 (2018).
- 816 31 Louie, G. V. *et al.* Structural determinants and modulation of substrate specificity in  
817 phenylalanine-tyrosine ammonia-lyases. *Chemistry & biology* **13**, 1327-1338 (2006).
- 818 32 Melnikov, A., Rogov, P., Wang, L., Gnirke, A. & Mikkelsen, T. S. Comprehensive mutational  
819 scanning of a kinase in vivo reveals substrate-dependent fitness landscapes. *Nucleic acids*  
820 *research* **42**, e112-e112 (2014).
- 821 33 Ritter, H. & Schulz, G. E. Structural basis for the entrance into the phenylpropanoid  
822 metabolism catalyzed by phenylalanine ammonia-lyase. *The Plant Cell* **16**, 3426-3436 (2004).
- 823 34 Rockah-Shmuel, L., Tóth-Petróczy, Á. & Tawfik, D. S. Systematic mapping of protein  
824 mutational space by prolonged drift reveals the deleterious effects of seemingly neutral  
825 mutations. *PLoS Comput Biol* **11**, e1004421 (2015).
- 826 35 Starita, L. M. *et al.* Activity-enhancing mutations in an E3 ubiquitin ligase identified by high-  
827 throughput mutagenesis. *Proceedings of the National Academy of Sciences* **110**, E1263-  
828 E1272 (2013).
- 829 36 Wang, L. *et al.* Structural and biochemical characterization of the therapeutic *Anabaena*  
830 *variabilis* phenylalanine ammonia lyase. *Journal of molecular biology* **380**, 623-635 (2008).
- 831 37 Wang, L. *et al.* Structure-based chemical modification strategy for enzyme replacement  
832 treatment of phenylketonuria. *Molecular genetics and metabolism* **86**, 134-140 (2005).
- 833 38 Cooke, H. A., Christianson, C. V. & Bruner, S. D. Structure and chemistry of 4-  
834 methylideneimidazole-5-one containing enzymes. *Current opinion in chemical biology* **13**,  
835 460-468 (2009).
- 836 39 Feng, L., Wanninayake, U., Strom, S., Geiger, J. & Walker, K. D. Mechanistic, mutational, and  
837 structural evaluation of a *Taxus* phenylalanine aminomutase. *Biochemistry* **50**, 2919-2930  
838 (2011).

- 839 40 Cooke, H. A. & Bruner, S. D. Probing the active site of MIO-dependent aminomutases, key  
840 catalysts in the biosynthesis of  $\beta$ -amino acids incorporated in secondary metabolites.  
841 *Biopolymers* **93**, 802-810 (2010).
- 842 41 Tomoiagă, R. B. *et al.* Saturation Mutagenesis for Phenylalanine Ammonia Lyases of  
843 Enhanced Catalytic Properties. *Biomolecules* **10**, 838 (2020).
- 844 42 MacDonald, M. J. & D’Cunha, G. B. A modern view of phenylalanine ammonia lyase.  
845 *Biochemistry and Cell Biology* **85**, 273-282 (2007).
- 846 43 Sato, T., Kiuchi, F. & Sankawa, U. Inhibition of phenylalanine ammonia-lyase by cinnamic acid  
847 derivatives and related compounds. *Phytochemistry* **21**, 845-850 (1982).
- 848 44 Zoń, J. & Laber, B. Novel phenylalanine analogues as putative inhibitors of enzymes acting on  
849 phenylalanine. *Phytochemistry* **27**, 711-714 (1988).
- 850 45 Poppe, L. & Rétey, J. Friedel–crafts-type mechanism for the enzymatic elimination of  
851 ammonia from histidine and phenylalanine. *Angewandte Chemie International Edition* **44**,  
852 3668-3688 (2005).
- 853 46 Phillips, J. C. *et al.* Scalable molecular dynamics on CPU and GPU architectures with NAMD.  
854 *The Journal of chemical physics* **153**, 044130 (2020).
- 855 47 Pinto, G. P. *et al.* New insights in the catalytic mechanism of tyrosine ammonia-lyase given  
856 by QM/MM and QM cluster models. *Archives of biochemistry and biophysics* **582**, 107-115  
857 (2015).
- 858 48 Bushnell, B., Rood, J. & Singer, E. BBMerge–Accurate paired shotgun read merging via  
859 overlap. *PloS one* **12**, e0185056 (2017).
- 860 49 Langmead, B. & Salzberg, S. L. Fast gapped-read alignment with Bowtie 2. *Nature methods* **9**,  
861 357 (2012).
- 862 50 Webb, B. & Sali, A. Comparative protein structure modeling using MODELLER. *Current*  
863 *protocols in bioinformatics* **54**, 5.6. 1-5.6. 37 (2016).
- 864 51 Morris, G. M. *et al.* AutoDock4 and AutoDockTools4: Automated docking with selective  
865 receptor flexibility. *Journal of computational chemistry* **30**, 2785-2791 (2009).
- 866 52 Lindorff-Larsen, K. *et al.* Improved side-chain torsion potentials for the Amber ff99SB protein  
867 force field. *Proteins: Structure, Function, and Bioinformatics* **78**, 1950-1958 (2010).
- 868 53 Berendsen, H. J., van der Spoel, D. & van Drunen, R. GROMACS: a message-passing parallel  
869 molecular dynamics implementation. *Computer physics communications* **91**, 43-56 (1995).
- 870 54 Van Der Spoel, D. *et al.* GROMACS: fast, flexible, and free. *Journal of computational*  
871 *chemistry* **26**, 1701-1718 (2005).
- 872 55 Pronk, S. *et al.* GROMACS 4.5: a high-throughput and highly parallel open source molecular  
873 simulation toolkit. *Bioinformatics* **29**, 845-854 (2013).
- 874 56 Páll, S., Abraham, M. J., Kutzner, C., Hess, B. & Lindahl, E. in *International conference on*  
875 *exascale applications and software*. 3-27 (Springer).
- 876 57 Abraham, M. J. *et al.* GROMACS: High performance molecular simulations through multi-  
877 level parallelism from laptops to supercomputers. *SoftwareX* **1**, 19-25 (2015).
- 878 58 Berendsen, H. J., Postma, J. v., van Gunsteren, W. F., DiNola, A. & Haak, J. R. Molecular  
879 dynamics with coupling to an external bath. *The Journal of chemical physics* **81**, 3684-3690  
880 (1984).
- 881 59 Darden, T., York, D. & Pedersen, L. Particle mesh Ewald: An  $N \cdot \log(N)$  method for Ewald  
882 sums in large systems. *The Journal of chemical physics* **98**, 10089-10092 (1993).
- 883 60 Melo, M. C. *et al.* NAMD goes quantum: an integrative suite for hybrid simulations. *Nature*  
884 *methods* **15**, 351 (2018).
- 885 61 MOPAC2016 (Colorado Springs, CO, USA, 2016).
- 886 62 Neese, F. Wiley Interdiscip. Rev.: Comput. Mol. Sci. **2**, 73–78. (2018).
- 887 63 Fiorin, G., Klein, M. L. & Hémin, J. Using collective variables to drive molecular dynamics  
888 simulations. *Molecular Physics* **111**, 3345-3362 (2013).

889
